# Supplementary material for: Catalytic synthesis of seven-membered carbocycles via ring expansion of cyclic β-ketoesters
Source: Royal Society of Chemistry journal article supplement (doi:10.1039/d2nj03473e), 2022-11-22
Supplement: d2nj03473e1.pdf [file d2nj03473e1.pdf]

# Catalytic Synthesis of Seven-Membered Carbocycles via Ring Expansion of Cyclic $\beta$ -Ketoesters

Li Chen,<sup>a</sup> Huangjiang Huang,<sup>a</sup> Benlong Luo,<sup>\*d</sup> Jinggong Liu,<sup>\*c</sup> Shuang Yang,<sup>\*b</sup> and  
Xinqiang Fang<sup>\*a,b</sup>

<sup>a</sup>College of Chemistry and Materials Science, Fujian Normal University, Fuzhou 350007, China.

<sup>b</sup>Fujian Institute of Research on the Structure of Matter, University of Chinese Academy of Sciences, Fuzhou 350100, China.

<sup>c</sup>Orthopedics Department, Guangdong Provincial Hospital of Traditional Chinese Medicine, The Second Affiliated Hospital of Guangzhou University of Chinese Medicine, Guangzhou 510120, China.

<sup>d</sup>Pingxiang University, Pingxiang 337055, China.

## Table of Contents

|             |                                                                |     |
|-------------|----------------------------------------------------------------|-----|
| <b>I</b>    | General information                                            | S1  |
| <b>II</b>   | X-ray crystallographic analysis                                | S2  |
| <b>III</b>  | Procedures for the preparation of substrates                   | S6  |
| <b>IV</b>   | Typical procedures for the ring expansion reactions            | S6  |
| <b>V</b>    | Procedures for the product derivatizations                     | S7  |
| <b>VI</b>   | Characterizations of new compounds                             | S8  |
| <b>VII</b>  | <sup>1</sup> H NMR and <sup>13</sup> C NMR spectra of products | S20 |
| <b>VIII</b> | HPLC spectra for ee determination                              | S45 |

### I. General Information.

Commercially available chemicals were directly used without further purification, unless otherwise mentioned, all experiments and manipulations involving air- or moisture-sensitive compounds were performed using standard Schlenk technique. All solvents were purified and dried using typical procedures. Proton nuclear magnetic resonance (<sup>1</sup>H NMR) spectra were recorded on a Bruker AVANCE III HD400 (400 MHz) and ECZ600S (600 MHz) spectrometer. Chemical shifts were recorded in parts per million (ppm,  $\delta$ ) relative to tetramethylsilane ( $\delta = 0.00$  ppm). <sup>1</sup>H NMR splitting patterns are designated as singlet (s), doublet (d), triplet (t), quartet (q), dd (doublet of doublets); m (multiplet), and etc. All first-order splitting patterns were assigned on the basis of the appearance of the multiplet. Splitting patterns that could not be easily interpreted are designated as multiplet (m) or broad (br). Carbon nuclear magnetic resonance (<sup>13</sup>C NMR) spectra were recorded on a Bruker AVANCE III HD400 (101

MHz) and ECZ600S (151 MHz) spectrometers. High resolution mass spectral analysis (HRMS) was performed on Thermo Fisher Scientific Q Exactive Plus Hybrid Quadrupole-Orbitrap Mass Spectrometer. X-ray crystallography analysis was performed on Agilent Super Nova X-ray diffractionmeter. Analytical thin-layer chromatography (TLC) was carried out on WFH-203 F254 pre-coated silica gel plate (0.2 mm thickness). Visualization was performed using a UV lamp or 2,4-Dinitrophenylhydrazine or potassium permanganate stain or phosphomolybdic acid. All substrates of alkynyl diketones were prepared according to the literature reports.<sup>[1-4]</sup>

## II. X-ray crystallographic analysis

Method for single crystals cultivation: a pure solid sample (10–20 mg) was dissolved in dichloromethane/ethyl acetate/THF (1 mL) in a vial at room temperature, and petroleum ether/hexane (2 mL) was added into the above solution slowly while keeping the sample completely dissolved. The vial was properly sealed with parafilm and kept at room temperature to allow the slow evaporation of the solvents until a single crystal was obtained.

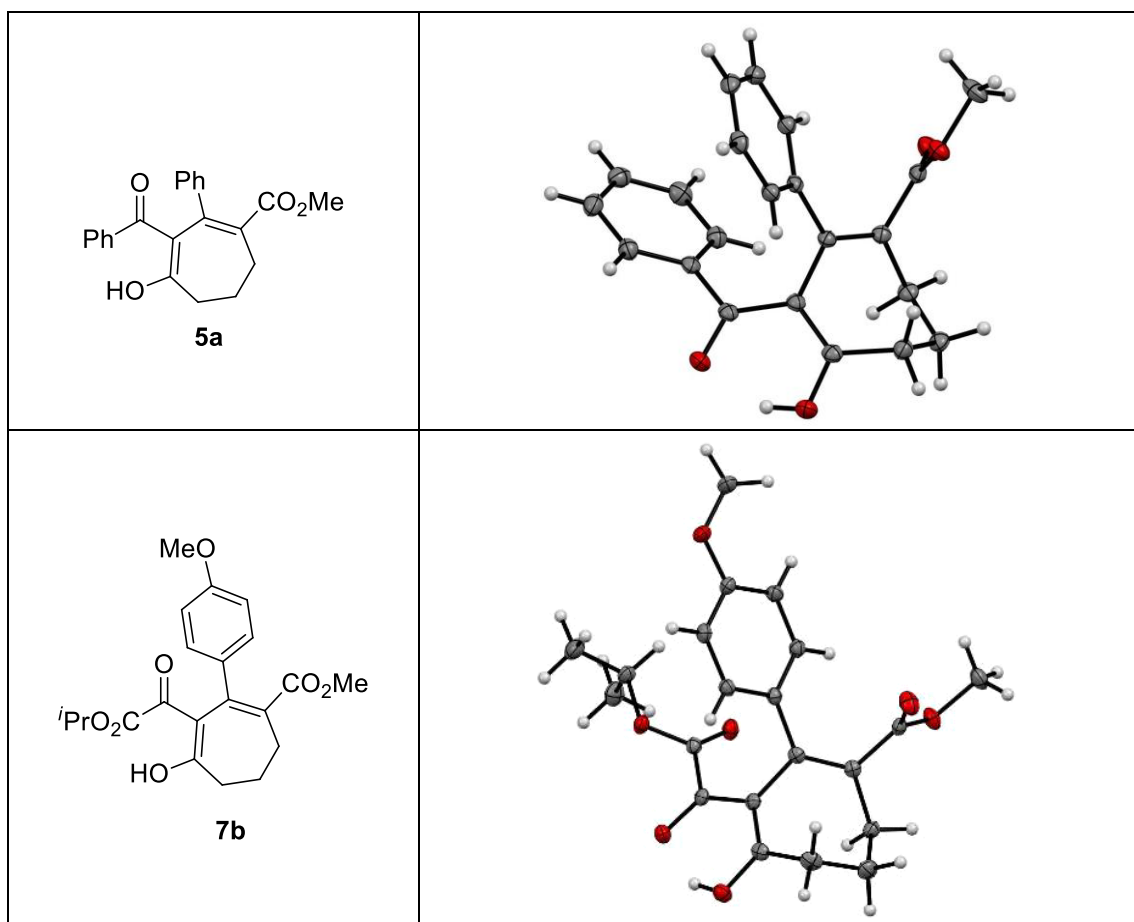

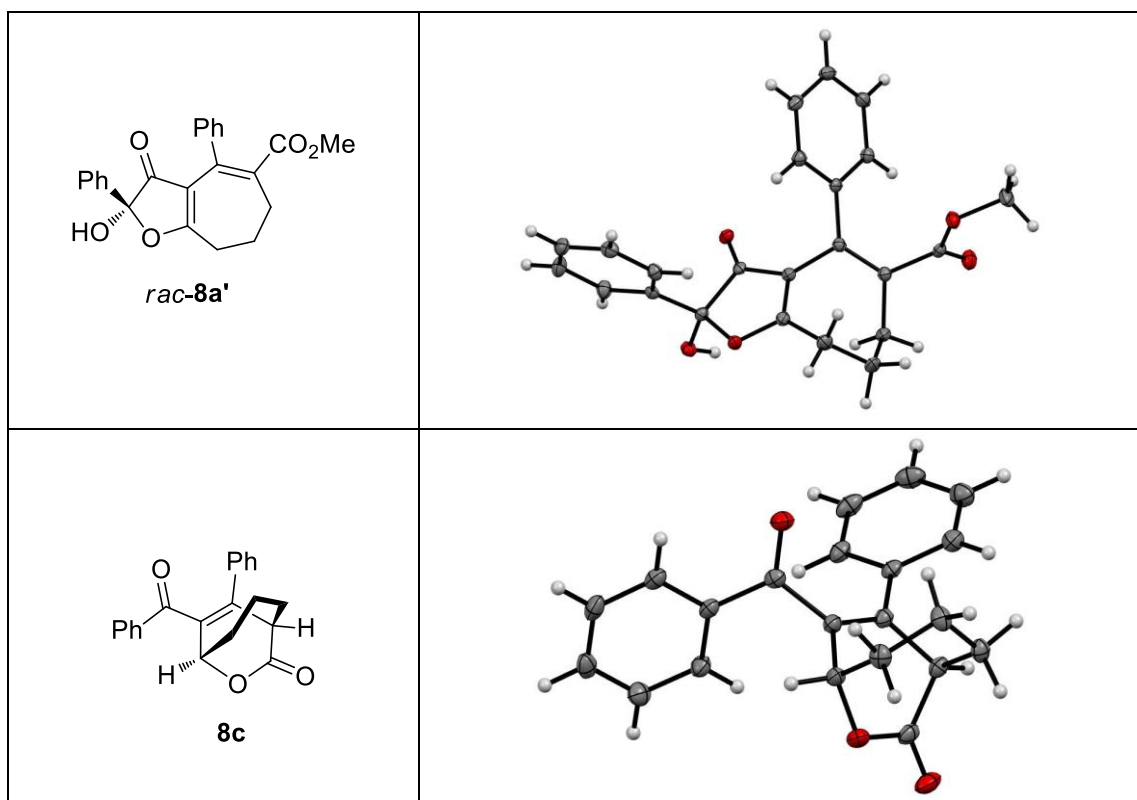

**Table S1 Crystal data and structure refinement for 5a.**

|                                      |                                                |
|--------------------------------------|------------------------------------------------|
| Identification code                  | 5a                                             |
| Empirical formula                    | C <sub>22</sub> H <sub>20</sub> O <sub>4</sub> |
| Formula weight                       | 348.38                                         |
| Temperature/K                        | 100(2)                                         |
| Crystal system                       | monoclinic                                     |
| Space group                          | P2 <sub>1</sub> /n                             |
| a/Å                                  | 6.593                                          |
| b/Å                                  | 15.25490(10)                                   |
| c/Å                                  | 17.53070(10)                                   |
| α/°                                  | 90                                             |
| β/°                                  | 93.1820(10)                                    |
| γ/°                                  | 90                                             |
| Volume/Å <sup>3</sup>                | 1760.335(15)                                   |
| Z                                    | 4                                              |
| ρ <sub>calc</sub> /g/cm <sup>3</sup> | 1.315                                          |
| μ/mm <sup>-1</sup>                   | 0.464                                          |
| F(000)                               | 736.0                                          |
| Crystal size/mm <sup>3</sup>         | 0.1 × 0.1 × 0.1                                |
| Radiation                            | GaKα (λ = 1.3405)                              |
| 2θ range for data collection/°       | 6.682 to 120.956                               |
| Index ranges                         | -8 ≤ h ≤ 8, -19 ≤ k ≤ 19, -22 ≤ l ≤ 22         |

|                                                |                                                                  |
|------------------------------------------------|------------------------------------------------------------------|
| Reflections collected                          | 69133                                                            |
| Independent reflections                        | 4034 [ $R_{\text{int}} = 0.0873$ , $R_{\text{sigma}} = 0.0250$ ] |
| Data/restraints/parameters                     | 4034/0/237                                                       |
| Goodness-of-fit on $F^2$                       | 1.037                                                            |
| Final R indexes [ $I \geq 2\sigma(I)$ ]        | $R_1 = 0.0378$ , $wR_2 = 0.0962$                                 |
| Final R indexes [all data]                     | $R_1 = 0.0445$ , $wR_2 = 0.0989$                                 |
| Largest diff. peak/hole / $e \text{ \AA}^{-3}$ | 0.32/-0.22                                                       |

**Table S2 Crystal data and structure refinement for 7b.**

|                                                |                                                                  |
|------------------------------------------------|------------------------------------------------------------------|
| Identification code                            | 7b                                                               |
| Empirical formula                              | $\text{C}_{21}\text{H}_{24}\text{O}_7$                           |
| Formula weight                                 | 388.40                                                           |
| Temperature/K                                  | 100(2)                                                           |
| Crystal system                                 | monoclinic                                                       |
| Space group                                    | $P2_1/n$                                                         |
| $a/\text{\AA}$                                 | 17.1896(3)                                                       |
| $b/\text{\AA}$                                 | 5.80260(10)                                                      |
| $c/\text{\AA}$                                 | 20.7903(4)                                                       |
| $\alpha/^\circ$                                | 90                                                               |
| $\beta/^\circ$                                 | 110.598(2)                                                       |
| $\gamma/^\circ$                                | 90                                                               |
| Volume/ $\text{\AA}^3$                         | 1941.15(7)                                                       |
| Z                                              | 4                                                                |
| $\rho_{\text{calc}}/\text{g/cm}^3$             | 1.329                                                            |
| $\mu/\text{mm}^{-1}$                           | 0.529                                                            |
| F(000)                                         | 824.0                                                            |
| Crystal size/ $\text{mm}^3$                    | $0.1 \times 0.1 \times 0.1$                                      |
| Radiation                                      | $\text{GaK}\alpha$ ( $\lambda = 1.3405$ )                        |
| $2\theta$ range for data collection/ $^\circ$  | 5.012 to 121.02                                                  |
| Index ranges                                   | $-22 \leq h \leq 22$ , $-5 \leq k \leq 7$ , $-25 \leq l \leq 26$ |
| Reflections collected                          | 38963                                                            |
| Independent reflections                        | 4411 [ $R_{\text{int}} = 0.0901$ , $R_{\text{sigma}} = 0.0444$ ] |
| Data/restraints/parameters                     | 4411/0/258                                                       |
| Goodness-of-fit on $F^2$                       | 1.102                                                            |
| Final R indexes [ $I \geq 2\sigma(I)$ ]        | $R_1 = 0.0397$ , $wR_2 = 0.1072$                                 |
| Final R indexes [all data]                     | $R_1 = 0.0464$ , $wR_2 = 0.1116$                                 |
| Largest diff. peak/hole / $e \text{ \AA}^{-3}$ | 0.31/-0.24                                                       |

**Table S3 Crystal data and structure refinement for cl-1\_auto.**

|                     |           |
|---------------------|-----------|
| Identification code | cl-1_auto |
|---------------------|-----------|

|                                             |                                                               |
|---------------------------------------------|---------------------------------------------------------------|
| Empirical formula                           | C <sub>23</sub> H <sub>20</sub> O <sub>5</sub>                |
| Formula weight                              | 376.39                                                        |
| Temperature/K                               | 100(2)                                                        |
| Crystal system                              | triclinic                                                     |
| Space group                                 | P-1                                                           |
| a/Å                                         | 8.6573(7)                                                     |
| b/Å                                         | 10.0811(7)                                                    |
| c/Å                                         | 12.3197(11)                                                   |
| α/°                                         | 84.259(7)                                                     |
| β/°                                         | 69.811(8)                                                     |
| γ/°                                         | 69.254(7)                                                     |
| Volume/Å <sup>3</sup>                       | 943.40(15)                                                    |
| Z                                           | 2                                                             |
| ρ <sub>calc</sub> /g/cm <sup>3</sup>        | 1.325                                                         |
| μ/mm <sup>-1</sup>                          | 0.486                                                         |
| F(000)                                      | 396.0                                                         |
| Crystal size/mm <sup>3</sup>                | 0.1 × 0.1 × 0.1                                               |
| Radiation                                   | GaKα (λ = 1.3405)                                             |
| 2Θ range for data collection/°              | 8.156 to 120.668                                              |
| Index ranges                                | -11 ≤ h ≤ 11, -13 ≤ k ≤ 13, -11 ≤ l ≤ 15                      |
| Reflections collected                       | 12253                                                         |
| Independent reflections                     | 4188 [R <sub>int</sub> = 0.0220, R <sub>sigma</sub> = 0.0213] |
| Data/restraints/parameters                  | 4188/0/256                                                    |
| Goodness-of-fit on F <sup>2</sup>           | 1.052                                                         |
| Final R indexes [I ≥ 2σ (I)]                | R <sub>1</sub> = 0.0339, wR <sub>2</sub> = 0.0849             |
| Final R indexes [all data]                  | R <sub>1</sub> = 0.0355, wR <sub>2</sub> = 0.0861             |
| Largest diff. peak/hole / e Å <sup>-3</sup> | 0.36/-0.23                                                    |

**Table S4 Crystal data and structure refinement for 8c.**

|                     |                                                 |
|---------------------|-------------------------------------------------|
| Identification code | 8c                                              |
| Empirical formula   | C <sub>21</sub> H <sub>18</sub> NO <sub>3</sub> |
| Formula weight      | 318.35                                          |
| Temperature/K       | 100(2)                                          |
| Crystal system      | monoclinic                                      |
| Space group         | P2 <sub>1</sub>                                 |
| a/Å                 | 9.44830(10)                                     |
| b/Å                 | 9.97000(10)                                     |
| c/Å                 | 9.7662(2)                                       |
| α/°                 | 90                                              |
| β/°                 | 118.501(2)                                      |

|                                               |                                                               |
|-----------------------------------------------|---------------------------------------------------------------|
| $\gamma/^\circ$                               | 90                                                            |
| Volume/ $\text{\AA}^3$                        | 808.48(2)                                                     |
| Z                                             | 2                                                             |
| $\rho_{\text{calc}}/\text{g/cm}^3$            | 1.308                                                         |
| $\mu/\text{mm}^{-1}$                          | 0.443                                                         |
| F(000)                                        | 336.0                                                         |
| Crystal size/ $\text{mm}^3$                   | $0.1 \times 0.1 \times 0.1$                                   |
| Radiation                                     | GaK $\alpha$ ( $\lambda = 1.3405$ )                           |
| $2\theta$ range for data collection/ $^\circ$ | 8.958 to 120.866                                              |
| Index ranges                                  | $-12 \leq h \leq 12, -12 \leq k \leq 12, -12 \leq l \leq 12$  |
| Reflections collected                         | 33268                                                         |
| Independent reflections                       | 3678 [ $R_{\text{int}} = 0.0995, R_{\text{sigma}} = 0.0364$ ] |
| Data/restraints/parameters                    | 3678/1/217                                                    |
| Goodness-of-fit on $F^2$                      | 1.042                                                         |
| Final R indexes [ $I \geq 2\sigma(I)$ ]       | $R_1 = 0.0335, wR_2 = 0.0804$                                 |
| Final R indexes [all data]                    | $R_1 = 0.0352, wR_2 = 0.0813$                                 |
| Largest diff. peak/hole / $e \text{\AA}^{-3}$ | 0.18/-0.18                                                    |
| Flack parameter                               | -0.10(15)                                                     |

### III. Procedures for the preparation of substrates.

Substrates **1a–1h** are known compounds and were prepared according to the literature reports.<sup>[1-5]</sup>

Substrates **4a–4i** are known compounds and were prepared according to the literature reports.<sup>[6-7]</sup>

Substrates **6a, 6b** are known compounds and were prepared according to the literature reports.<sup>[8-9]</sup>

### IV. Typical procedures for the ring expansion reactions.

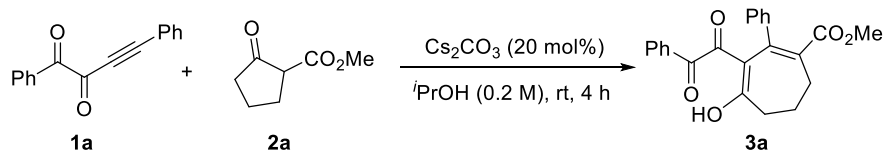

**1a** (47 mg, 0.2 mmol), **2a** (48  $\mu\text{L}$ , 0.4 mmol), and  $\text{Cs}_2\text{CO}_3$  (13.1 mg, 0.04 mmol) was added to  $i\text{PrOH}$  (1.0 mL) at room temperature. The reaction system was stirred for 4 h. the solvent was removed under reduced pressure and the residue was purified by flash chromatography (petroleum ether/ethyl acetate, v:v = 3:1) to give the product **3a** (63 mg, 84% yield). Compounds **3b–3h** were synthesized using the same method.

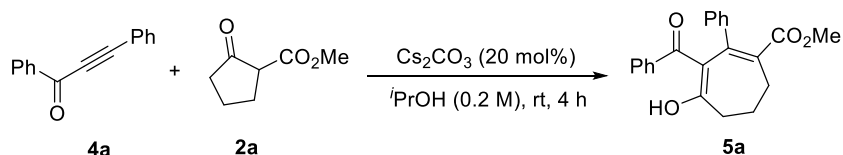

**4a** (206 mg, 1 mmol), **2a** (0.19 mL, 1.5 mmol), and  $\text{Cs}_2\text{CO}_3$  (65 mg, 0.2 mmol) was added to *i*PrOH (5.0 mL) at room temperature. The reaction system was stirred for 4 h. the solvent was removed under reduced pressure and the residue was purified by flash chromatography (petroleum ether/ethyl acetate, v:v = 5:1) to give the product **5a** (303 mg, 87% yield). Compounds **5b–5j** were synthesized using the same method.

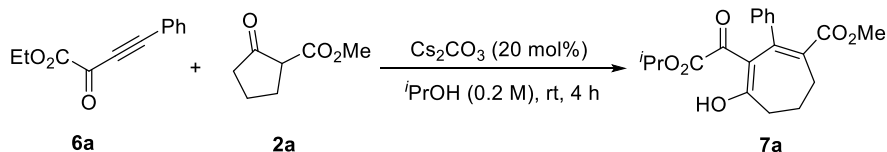

**6a** (40 mg, 0.2 mmol), **2a** (48  $\mu\text{L}$ , 0.4 mmol), and  $\text{Cs}_2\text{CO}_3$  (13 mg, 0.04 mmol) was added to *i*PrOH (1.0 mL) at room temperature. The reaction system was stirred for 4 h. the solvent was removed under reduced pressure and the residue was purified by flash chromatography (petroleum ether/ethyl acetate, v:v = 5:1) to give the product **7a** (58 mg, 81% yield). Compounds **7b** was synthesized using the same method.

## V. Procedures for the product derivatizations.

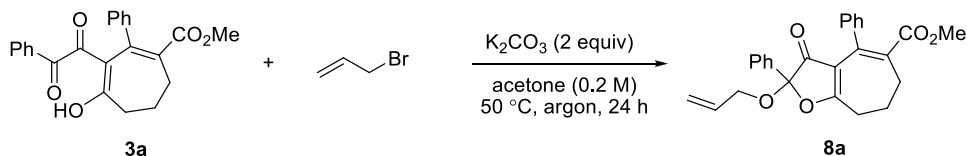

**3a** (38 mg, 0.1 mmol), allyl bromide (17  $\mu\text{L}$ , 0.2 mmol), and  $\text{K}_2\text{CO}_3$  (28 mg, 0.2 mmol) was added to acetone (0.5 mL) at 50 °C. The reaction system was stirred for 24 h. The mixture was quenched by aqueous  $\text{NH}_4\text{Cl}$  and extracted with ethyl acetate (3 $\times$ 5 mL). The organic solvent was removed under reduced pressure and the residue was purified by flash chromatography (petroleum ether/ethyl acetate, v:v = 3:1) to afford yellow oil **8a** (23 mg, 55% yield)

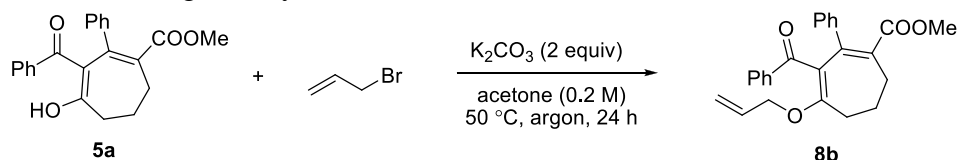

**5a** (105 mg, 0.3 mmol), allyl bromide (39  $\mu\text{L}$ , 0.45 mmol), and  $\text{K}_2\text{CO}_3$  (83 mg, 0.6 mmol) was add to acetone (1.5 mL) at 50 °C. The reaction system was stirred for 24 h. The mixture was quenched by aqueous  $\text{NH}_4\text{Cl}$  and extracted with ethyl acetate (3 $\times$ 5 mL). The organic solvent was removed under reduced pressure and the residue was purified by flash chromatography (petroleum ether/ethyl acetate, v:v = 5:1) to afford yellow solid **8b** (87 mg, 75% yield)

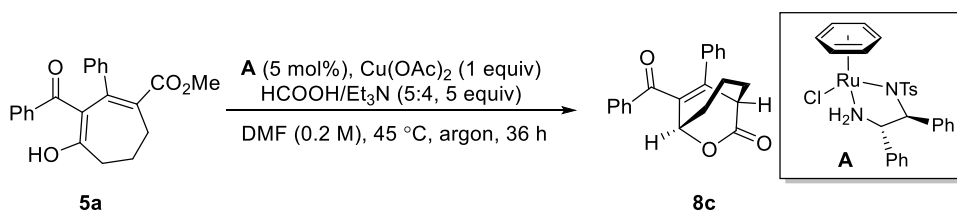

To a 10 mL flame-dry Schlenk tube equipped with a magnetic stir bar was added **5a** (70 mg, 0.2 mmol) and the catalyst **A** (6 mg, 0.01 mol), then formic acid/Et<sub>3</sub>N azeotrope (127 mg, 5:4, 5.0 equiv) dissolved in DMF (1 mL) was added and the mixture was stirred at 50 °C under argon atmosphere. After completion of the reaction as indicated by TLC, it was quenched with water, extracted with ethyl acetate (3 × 10 mL), washed with brine, dried over anhydrous Na<sub>2</sub>SO<sub>4</sub>, filtered and concentrated. The residue was purified by chromatography (petroleum ether/ethyl acetate, v:v = 5:1) to give white solid **8c** (27 mg, 42% yield, 98% *ee*).

## VI. Characterizations of new compounds

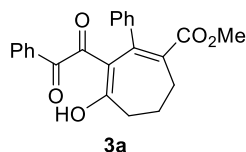

**methyl**

### 4-hydroxy-3-(2-oxo-2-phenylacetyl)-2-phenylcyclohepta-1,3-diene-1-carboxylate

**(3a)**: purified by flash chromatography on silica gel (petroleum ether/ethyl acetate, v:v = 3:1), white solid, mp 148–150 °C, 63 mg, 84% yield. <sup>1</sup>H NMR (400 MHz, acetone-d<sub>6</sub>) δ 7.64–7.62 (m, 2H), 7.47–7.43 (m, 3H), 7.38 (s, 1H), 7.25–7.24 (m, 3H), 7.13–7.10 (m, 2H), 3.43 (s, 3H), 3.13–3.05 (m, 1H), 3.02–2.94 (m, 1H), 2.65–2.62 (m, 2H), 2.41–2.34 (m, 2H); <sup>13</sup>C NMR (101 MHz, acetone-d<sub>6</sub>) δ 195.9, 193.3, 170.3, 138.8, 138.2, 136.8, 133.0, 129.4, 128.7, 128.5, 127.7, 127.7, 126.0, 111.9, 104.3, 51.1, 30.3, 30.0, 29.9. HRMS (MALDI-Quadrupole-Orbitrap) m/z: [M + Na]<sup>+</sup> Calcd for C<sub>23</sub>H<sub>20</sub>O<sub>5</sub>Na<sup>+</sup> 399.1203; Found 399.1208. IR (KBr thin film, cm<sup>-1</sup>): ν 3261, 2360, 2342, 1670, 1232, 764, 669. 655, 501.

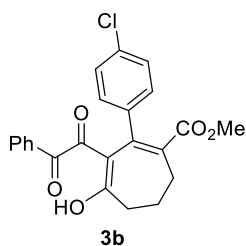

**methyl**

### 2-(4-chlorophenyl)-4-hydroxy-3-(2-oxo-2-phenylacetyl)cyclohepta-1,3-diene-1-ca



**rboxylate (3b):** purified by flash chromatography on silica gel (petroleum ether/ethyl acetate, v:v = 3:1), white solid, mp 165–167 °C, 60 mg, 73% yield. <sup>1</sup>H NMR (400 MHz, DMSO-d<sub>6</sub>) δ 8.57 (s, 1H), 7.48–7.43 (m, 5H), 7.34–7.32 (m, 2H), 7.07–7.05 (m, 2H), 3.44 (s, 3H), 3.11–3.03 (m, 1H), 2.97–2.89 (m, 1H), 2.59–2.57 (m, 2H), 2.31–2.24 (m, 2H); <sup>13</sup>C NMR (151 MHz, DMSO-d<sub>6</sub>) δ 197.2, 194.7, 170.3, 138.0, 137.4, 137.0, 133.4, 133.0, 130.7, 130.1, 129.4, 128.5, 126.5, 111.7, 105.3, 52.5, 30.6, 30.4, 30.2. HRMS (MALDI-Quadrupole-Orbitrap) m/z: [M + Na]<sup>+</sup> Calcd for C<sub>23</sub>H<sub>19</sub>ClO<sub>5</sub>Na<sup>+</sup> 433.0813; Found 433.0813. IR (KBr thin film, cm<sup>-1</sup>): ν 3734, 2360, 2342, 1717, 1264, 731, 702, 669.

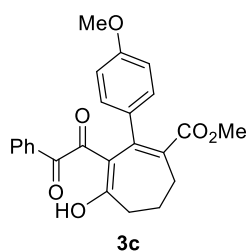

#### methyl

**4-hydroxy-2-(4-methoxyphenyl)-3-(2-oxo-2-phenylacetyl)cyclohepta-1,3-diene-1-carboxylate (3c):** purified by flash chromatography on silica gel (petroleum ether/ethyl acetate, v:v = 3:1), white solid, mp 185–187 °C, 75 mg, 92% yield. <sup>1</sup>H NMR (400 MHz, DMSO-d<sub>6</sub>) δ 8.57 (s, 1H), 7.51–7.48 (m, 2H), 7.47–7.44 (m, 3H), 7.00–6.96 (m, 2H), 6.84–6.81 (m, 2H), 3.76 (s, 3H), 3.46 (s, 3H), 3.06–2.98 (m, 1H), 2.91–2.83 (m, 1H), 2.55–2.52 (m, 2H), 2.34–2.27 (m, 2H); <sup>13</sup>C NMR (101 MHz, DMSO-d<sub>6</sub>) δ 197.0, 194.8, 171.1, 159.7, 138.3, 137.1, 131.8, 131.0, 130.2, 130.0, 129.4, 126.4, 114.0, 112.1, 105.5, 55.9, 52.4, 31.5, 30.4, 30.0. HRMS (MALDI-Quadrupole-Orbitrap) m/z: [M + Na]<sup>+</sup> Calcd for C<sub>24</sub>H<sub>22</sub>O<sub>6</sub>Na<sup>+</sup> 429.1309; Found 429.1307. IR (KBr thin film, cm<sup>-1</sup>): ν 3358, 2949, 2360, 2342, 1700, 1575, 1510, 1244, 1176, 1125, 1032, 832, 764, 669.

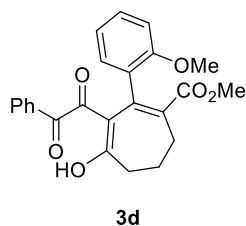

#### methyl

**4-hydroxy-2-(2-methoxyphenyl)-3-(2-oxo-2-phenylacetyl)cyclohepta-1,3-diene-1-carboxylate (3d):** purified by flash chromatography on silica gel (petroleum ether/ethyl acetate, v:v = 3:1), white solid, mp 115–117 °C, 58 mg, 71% yield. <sup>1</sup>H NMR (400 MHz, DMSO-d<sub>6</sub>) δ 8.38 (s, 1H), 7.36 (m, 5H), 7.14–7.10 (m, 1H), 6.83–6.71 (m, 3H), 3.43 (s, 3H), 3.29 (s, 3H), 3.01–2.92 (m, 1H), 2.84–2.76 (m, 1H), 2.58–

2.48 (m, 2H), 2.21–2.16 (m, 2H);  $^{13}\text{C}$  NMR (101 MHz, DMSO- $d_6$ )  $\delta$  196.5, 192.5, 169.5, 156.7, 136.9, 135.2, 135.2, 132.6, 129.8, 129.5, 129.1, 128.8, 127.6, 126.0, 120.0, 112.2, 110.7, 55.4, 51.6, 30.1, 29.4, 29.3. HRMS (MALDI-Quadrupole-Orbitrap)  $m/z$ :  $[\text{M} + \text{Na}]^+$  Calcd for  $\text{C}_{24}\text{H}_{22}\text{O}_6\text{Na}^+$  429.1309; Found 429.1311. IR (KBr thin film,  $\text{cm}^{-1}$ ):  $\nu$  3373, 2949, 1705, 1560, 1434, 1244, 1124, 1023, 732, 700.

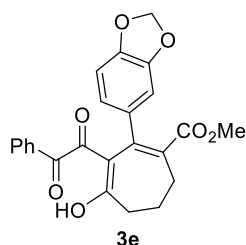

### methyl

**2-(benzo[d][1,3]dioxol-5-yl)-4-hydroxy-3-(2-oxo-2-phenylacetyl)cyclohepta-1,3-diene-1-carboxylate (3e)**: purified by flash chromatography on silica gel (petroleum ether/ethyl acetate, v:v = 3:1), white solid, mp 208–210 °C, 67 mg, 80% yield.  $^1\text{H}$  NMR (400 MHz, DMSO- $d_6$ )  $\delta$  8.52 (s, 1H), 7.44–7.39 (m, 5H), 6.79–6.76 (m, 1H), 6.55–6.48 (m, 2H), 5.98 (s, 2H), 3.42 (s, 3H), 3.01–2.93 (m, 1H), 2.87–2.79 (m, 1H), 2.49–2.40 (m, 2H), 2.26–2.22 (m, 2H);  $^{13}\text{C}$  NMR (101 MHz, DMSO- $d_6$ )  $\delta$  196.5, 194.3, 170.5, 147.3, 147.2, 136.6, 132.5, 131.9, 129.6, 128.9, 126.0, 122.1, 111.5, 108.9, 108.1, 101.5, 52.0, 30.6, 29.9, 29.8. HRMS (MALDI-Quadrupole-Orbitrap)  $m/z$ :  $[\text{M} + \text{Na}]^+$  Calcd for  $\text{C}_{24}\text{H}_{20}\text{O}_7\text{Na}^+$  443.1101; Found 443.1104. IR (KBr thin film,  $\text{cm}^{-1}$ ):  $\nu$  3735, 2360, 2342, 1700, 1235, 1036, 764, 669.

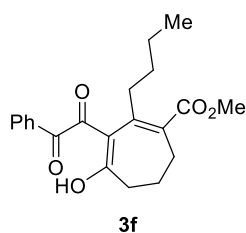

### methyl

**2-butyl-4-hydroxy-3-(2-oxo-2-phenylacetyl)cyclohepta-1,3-diene-1-carboxylate (3f)**: purified by flash chromatography on silica gel (petroleum ether/ethyl acetate, v:v = 3:1), yellow oil, 43 mg, 60% yield.  $^1\text{H}$  NMR (400 MHz, DMSO- $d_6$ )  $\delta$  8.49 (s, 1H), 7.40–7.35 (m, 5H), 3.65 (s, 3H), 2.88–2.79 (m, 1H), 2.76–2.70 (m, 1H), 2.62 (t,  $J$  = 6.4 Hz, 2H), 2.33–2.30 (m, 2H), 2.14–2.06 (m, 2H), 1.18–1.12 (m, 4H), 0.75–0.70 (m, 3H);  $^{13}\text{C}$  NMR (101 MHz, DMSO- $d_6$ )  $\delta$  197.9, 193.3, 169.2, 142.0, 136.8, 130.0, 129.6, 128.9, 125.9, 111.7, 52.0, 31.6, 30.1, 29.7, 29.5, 28.9, 22.4, 14.3. HRMS (MALDI-Quadrupole-Orbitrap)  $m/z$ :  $[\text{M} + \text{Na}]^+$  Calcd for  $\text{C}_{21}\text{H}_{24}\text{O}_5\text{Na}^+$  379.1516;

Found 379.1520. IR (KBr thin film,  $\text{cm}^{-1}$ ):  $\nu$  3055, 1728, 1435, 1264, 1025, 896, 131, 702.

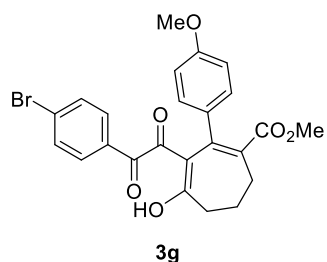

### methyl

#### **4-hydroxy-3-(2-oxo-2-phenylacetyl)-2-phenylcyclohepta-1,3-diene-1-carboxylate (3g):**

purified by flash chromatography on silica gel (petroleum ether/ethyl acetate, v:v = 3:1), white solid, mp 82–84 °C, 62 mg, 64% yield.  $^1\text{H}$  NMR (400 MHz, acetone- $d_6$ )  $\delta$  7.61–7.58 (m, 2H), 7.55–7.52 (m, 2H), 7.44 (s, 1H), 6.99–6.97 (m, 2H), 6.77–6.75 (m, 2H), 3.75 (s, 3H), 3.43 (s, 3H), 3.06–2.98 (m, 1H), 2.95–2.87 (m, 1H), 2.57–2.54 (m, 2H), 2.38–2.31 (m, 2H);  $^{13}\text{C}$  NMR (101 MHz, acetone- $d_6$ )  $\delta$  195.7, 193.8, 170.6, 159.8, 137.9, 136.4, 132.2, 131.9, 130.9, 129.9, 128.4, 123.3, 113.3, 112.2, 103.9, 55.0, 51.3, 31.0, 30.1, 29.8. HRMS (MALDI-Quadrupole-Orbitrap) m/z:  $[\text{M} + \text{Na}]^+$  Calcd for  $\text{C}_{24}\text{H}_{21}\text{BrO}_6\text{Na}^+$  507.0414; Found 507.0411. IR (KBr thin film,  $\text{cm}^{-1}$ ):  $\nu$  3734, 2360, 2342, 1700, 1508, 1264, 731, 702, 669.

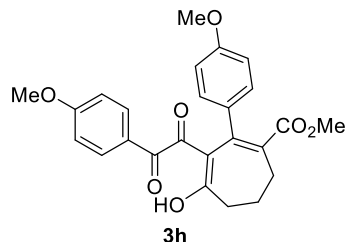

### methyl

#### **4-hydroxy-2-(4-methoxyphenyl)-3-(2-(4-methoxyphenyl)-2-oxoacetyl)cyclohepta-1,3-diene-1-carboxylate (3h):**

purified by flash chromatography on silica gel (petroleum ether/ethyl acetate, v:v = 3:1), white solid, mp 198–200 °C, 57 mg, 66% yield.  $^1\text{H}$  NMR (400 MHz, DMSO- $d_6$ )  $\delta$  8.41 (s, 1H) 7.37–7.35 (m, 2H), 6.96–6.92 (m, 4H), 6.80–6.77 (m, 2H), 3.76 (s, 3H), 3.72 (s, 3H), 3.41 (s, 3H), 2.97–2.90 (m, 1H), 2.84–2.76 (m, 1H), 2.48–2.46 (m, 2H), 2.32–2.21 (m, 2H);  $^{13}\text{C}$  NMR (101 MHz, DMSO- $d_6$ )  $\delta$  196.6, 194.1, 170.7, 160.3, 159.3, 131.1, 130.6, 129.8, 128.7, 127.5, 114.3, 113.5, 111.6, 55.7, 55.5, 51.9, 31.1, 30.0, 29.6. HRMS (MALDI-Quadrupole-Orbitrap) m/z:  $[\text{M} + \text{Na}]^+$  Calcd for  $\text{C}_{25}\text{H}_{24}\text{O}_7\text{Na}^+$  459.1414; Found 459.1422. IR (KBr thin film,  $\text{cm}^{-1}$ ):  $\nu$  3735, 2360, 2342, 1700, 1509, 1247, 1176, 749, 734, 700, 669.

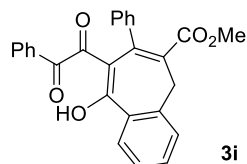

3i

**methyl**

**9-hydroxy-8-(2-oxo-2-phenylacetyl)-7-phenyl-5H-benzo[7]annulene-6-carboxylate (3i):** purified by flash chromatography on silica gel (petroleum ether/ethyl acetate, v:v = 3:1), white solid, mp 210–211 °C, 43 mg, 51% yield. <sup>1</sup>H NMR (400 MHz, acetone-d<sub>6</sub>) δ 8.12–8.10 (m, 2H), 7.79–7.75 (m, 1H), 7.68–7.65 (m, 2H), 7.61–7.57 (m, 2H), 7.53–7.49 (m, 2H), 7.46–7.41 (m, 3H), 7.19–7.17 (m, 3H), 7.05–7.03 (m, 2H), 3.70 (brs, 2H), 3.37 (s, 3H); <sup>13</sup>C NMR (101 MHz, acetone-d<sub>6</sub>) δ 196.0, 181.6, 167.6, 140.2, 137.9, 137.8, 136.5, 134.5, 129.2, 128.6, 128.4, 128.1, 127.5, 127.3, 127.2, 126.1, 125.8, 123.4, 113.0, 50.8, 35.7. HRMS (MALDI-Quadrupole-Orbitrap) m/z: [M + Na]<sup>+</sup> Calcd for C<sub>27</sub>H<sub>20</sub>O<sub>5</sub>Na<sup>+</sup> 447.1203; Found 447.1204. IR (KBr thin film, cm<sup>-1</sup>): ν 3304, 2946, 1717, 1683, 1541, 1399, 1247, 1124, 763, 695.

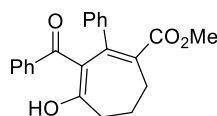

5a

**methyl 3-benzoyl-4-hydroxy-2-phenylcyclohepta-1,3-diene-1-carboxylate (5a):** purified by flash chromatography on silica gel (petroleum ether/ethyl acetate, v:v = 5:1), white solid, mp 139–141 °C, 303 mg, 87% yield. <sup>1</sup>H NMR (400 MHz, CDCl<sub>3</sub>) δ 7.22–7.18 (m, 3H), 7.12–7.08 (m, 2H), 6.95–6.90 (m, 3H), 6.81–6.78 (m, 2H), 3.45 (s, 3H), 2.90–2.63 (m, 3H), 2.58–2.45 (m, 1H), 2.38–2.24 (m, 2H); <sup>13</sup>C NMR (101 MHz, CDCl<sub>3</sub>) δ 195.4, 191.0, 170.9, 145.3, 140.2, 137.1, 131.0, 130.6, 128.7, 127.8, 127.8, 127.3, 127.2, 113.0, 51.7, 35.2, 31.0, 29.4. HRMS (MALDI-Quadrupole-Orbitrap) m/z: [M + Na]<sup>+</sup> Calcd for C<sub>22</sub>H<sub>20</sub>O<sub>4</sub>Na<sup>+</sup> 371.1254; Found 371.1261. IR (KBr thin film, cm<sup>-1</sup>): ν 3735, 2360, 2342, 1705, 1265, 731, 696, 669.

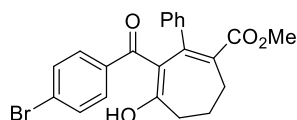

5b

**methyl**

**3-(4-bromobenzoyl)-4-hydroxy-2-phenylcyclohepta-1,3-diene-1-carboxylate (5b):** purified by flash chromatography on silica gel (petroleum ether/ethyl acetate, v:v = 5:1), white solid, mp 131–133 °C, 397 mg, 93% yield. <sup>1</sup>H NMR (400 MHz, CDCl<sub>3</sub>) δ 7.25–7.23 (m, 2H), 7.09–7.07 (m, 2H), 7.00–6.95 (m, 3H), 6.80–6.78 (m, 2H), 3.46 (s,

3H), 2.86–2.62 (m, 3H), 2.57–2.46 (m, 1H), 2.34–2.30 (m, 2H);  $^{13}\text{C}$  NMR (101 MHz,  $\text{CDCl}_3$ )  $\delta$  195.5, 189.9, 170.8, 144.7, 140.1, 136.0, 131.1, 131.0, 129.4, 128.7, 127.7, 127.5, 125.6, 113.0, 51.8, 35.2, 31.1, 29.4. HRMS (MALDI-Quadrupole-Orbitrap)  $m/z$ :  $[\text{M} + \text{Na}]^+$  Calcd for  $\text{C}_{22}\text{H}_{19}\text{O}_4\text{Na}^+$  449.0359; Found 449.0364. IR (KBr thin film,  $\text{cm}^{-1}$ ):  $\nu$  3735, 2360, 2342, 1716, 1264, 1011, 731, 702, 669.

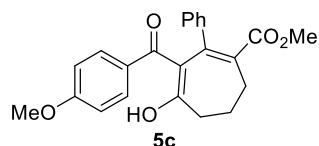

**methyl**

**4-hydroxy-3-(4-methoxybenzoyl)-2-phenylcyclohepta-1,3-diene-1-carboxylate**

**(5c)**: purified by flash chromatography on silica gel (petroleum ether/ethyl acetate,  $v:v = 5:1$ ), white solid, mp 120–122  $^{\circ}\text{C}$ , 269 mg, 71% yield.  $^1\text{H}$  NMR (400 MHz,  $\text{CDCl}_3$ )  $\delta$  7.31–7.29 (m, 2H), 6.98–6.96 (m, 3H), 6.88–6.86 (m, 2H), 6.64–6.61 (m, 2H), 3.73 (s, 3H), 3.47 (s, 3H), 2.85–2.64 (m, 3H), 2.60–2.44 (m, 1H), 2.37–2.21 (m, 2H);  $^{13}\text{C}$  NMR (101 MHz,  $\text{CDCl}_3$ )  $\delta$  194.8, 189.8, 171.1, 162.1, 145.5, 140.2, 130.5, 130.3, 129.6, 128.7, 127.5, 127.3, 113.2, 112.2, 55.4, 51.8, 35.2, 31.1, 29.5. HRMS (MALDI-Quadrupole-Orbitrap)  $m/z$ :  $[\text{M} + \text{Na}]^+$  Calcd for  $\text{C}_{23}\text{H}_{22}\text{O}_5\text{Na}^+$  401.1359; Found 401.1363. IR (KBr thin film,  $\text{cm}^{-1}$ ):  $\nu$  3735, 2948, 2360, 2342, 1705, 1603, 1251, 1169, 1029, 839, 765, 613.

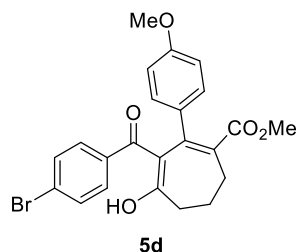

**methyl**

**3-(4-bromobenzoyl)-4-hydroxy-2-(4-methoxyphenyl)cyclohepta-1,3-diene-1-carboxylate (5d)**

**(5d)**: purified by flash chromatography on silica gel (petroleum ether/ethyl acetate,  $v:v = 5:1$ ), white solid, mp 141–143  $^{\circ}\text{C}$ , 430 mg, 94% yield.  $^1\text{H}$  NMR (400 MHz,  $\text{CDCl}_3$ )  $\delta$  7.26–7.24 (m, 2H), 7.11–7.09 (m, 2H), 6.75–6.72 (m, 2H), 6.52–6.49 (m, 2H), 3.68 (s, 3H), 3.50 (s, 3H), 2.85–2.57 (m, 3H), 2.52–2.45 (m, 1H), 2.36–2.23 (m, 2H);  $^{13}\text{C}$  NMR (101 MHz,  $\text{CDCl}_3$ )  $\delta$  195.3, 190.0, 170.9, 159.0, 144.6, 136.1, 132.6, 131.1, 130.1, 129.6, 129.3, 125.6, 113.1, 112.9, 55.3, 51.8, 35.1, 31.2, 29.4. HRMS (MALDI-Quadrupole-Orbitrap)  $m/z$ :  $[\text{M} + \text{H}]^+$  Calcd for  $\text{C}_{23}\text{H}_{21}\text{BrO}_5\text{Na}^+$  479.0465; Found 479.0470. IR (KBr thin film,  $\text{cm}^{-1}$ ):  $\nu$  3735, 2949, 2360, 2342, 1701, 1588, 1508, 1247, 1173, 1011, 831, 734, 678.

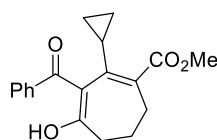

5e

**methyl 3-benzoyl-2-cyclopropyl-4-hydroxycyclohepta-1,3-diene-1-carboxylate (5e):** purified by flash chromatography on silica gel (petroleum ether/ethyl acetate, v:v = 5:1), colorless oil, 181 mg, 58% yield.  $^1\text{H}$  NMR (400 MHz,  $\text{CDCl}_3$ )  $\delta$  7.69–7.65 (m, 2H), 7.48–7.36 (m, 3H), 3.80 (s, 3H), 2.74 (m, 1H), 2.45–2.42 (m, 2H), 2.27–2.20 (m, 3H), 2.09–2.00 (m, 1H), 0.82–0.78 (m, 1H), 0.15–0.11 (m, 3H);  $^{13}\text{C}$  NMR (101 MHz,  $\text{CDCl}_3$ )  $\delta$  196.4, 186.7, 168.8, 151.7, 137.4, 131.7, 129.6, 128.6, 128.3, 109.7, 51.5, 35.2, 30.6, 28.1, 16.6. HRMS (MALDI-Quadrupole-Orbitrap) m/z:  $[\text{M} + \text{H}]^+$  Calcd for  $\text{C}_{19}\text{H}_{20}\text{O}_4\text{Na}^+$  335.1254; Found 335.1258. IR (KBr thin film,  $\text{cm}^{-1}$ ):  $\nu$  3628, 2947, 2360, 2342, 1706, 1559, 1431, 1233, 1156, 1106, 1020, 762, 695, 677.

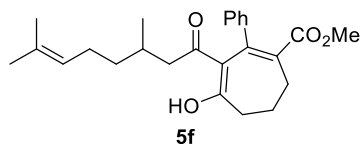

5f

**methyl 3-(3,7-dimethyloct-6-enoyl)-4-hydroxy-2-phenylcyclohepta-1,3-diene-1-carboxylate (5f):** purified by flash chromatography on silica gel (petroleum ether/ethyl acetate, v:v = 5:1), colorless oil, 305 mg, 77% yield.  $^1\text{H}$  NMR (400 MHz,  $\text{CDCl}_3$ )  $\delta$  7.33–7.27 (m, 3H), 7.20–7.17 (m, 2H), 5.01–4.96 (m, 1H), 3.50 (s, 3H), 2.77–2.63 (m, 2H), 2.44–2.34 (m, 2H), 2.27–2.15 (m, 2H), 1.87–1.70 (m, 4H), 1.67–1.65 (m, 4H), 1.56–1.52 (m, 3H), 1.06–0.84 (m, 2H), 0.74–0.59 (m, 3H);  $^{13}\text{C}$  NMR (101 MHz,  $\text{CDCl}_3$ )  $\delta$  197.5, 197.3, 195.1, 195.0, 171.1, 171.0, 143.2, 143.1, 140.9, 140.7, 132.0, 131.9, 131.6, 131.5, 128.4, 128.3, 128.3, 124.4, 124.3, 113.4, 113.1, 51.8, 44.7, 37.0, 36.8, 35.1, 35.0, 31.0, 30.3, 30.1, 29.1, 25.8, 25.3, 25.2, 19.4, 19.1, 17.7. HRMS (MALDI-Quadrupole-Orbitrap) m/z:  $[\text{M} + \text{Na}]^+$  Calcd for  $\text{C}_{25}\text{H}_{32}\text{O}_4\text{Na}^+$  419.2193; Found 419.2193. IR (KBr thin film,  $\text{cm}^{-1}$ ):  $\nu$  3735, 2927, 2360, 2342, 1714, 1559, 1431, 1168, 1099, 764, 701, 680.

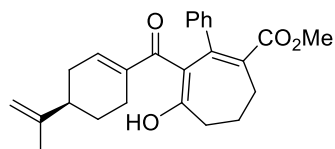

5g

**methyl (R)-4-hydroxy-2-phenyl-3-(4-(prop-1-en-2-yl)cyclohex-1-ene-1-carbonyl)cyclohepta-1,3-diene-1-carboxylate (5g):** purified by flash chromatography on silica gel (petroleum ether/ethyl acetate, v:v = 5:1), white solid, mp 100–102  $^{\circ}\text{C}$ , 287 mg, 73%

yield.  $^1\text{H}$  NMR (400 MHz,  $\text{CDCl}_3$ )  $\delta$  7.25–7.20 (m, 3H), 7.03–7.01 (m, 2H), 5.88–5.87 (m, 1H), 4.65 (s, 1H), 4.55 (s, 1H), 3.48 (s, 3H), 2.79–2.45 (m, 4H), 2.28–2.21 (m, 3H), 2.03–1.96 (m, 1H), 1.79–1.72 (m, 1H), 1.60 (s, 5H), 1.45–1.41 (m, 1H);  $^{13}\text{C}$  NMR (101 MHz,  $\text{CDCl}_3$ )  $\delta$  196.6, 171.2, 149.2, 149.1, 146.0, 141.7, 135.2, 129.7, 128.7, 127.8, 127.6, 109.1, 51.8, 35.7, 31.1, 30.8, 29.5, 26.4. HRMS (MALDI-Quadrupole-Orbitrap)  $m/z$ :  $[\text{M} + \text{Na}]^+$  Calcd for  $\text{C}_{25}\text{H}_{28}\text{O}_4\text{Na}^+$  415.1880; Found 415.1884. IR (KBr thin film,  $\text{cm}^{-1}$ ):  $\nu$  3735, 2360, 2342, 1559, 1264, 896, 731, 703, 669.

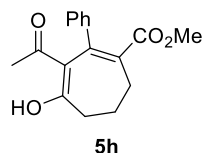

**methyl 3-acetyl-4-hydroxy-2-phenylcyclohepta-1,3-diene-1-carboxylate (5h):** purified by flash chromatography on silica gel (petroleum ether/ethyl acetate, v:v = 5:1), white solid, mp 93–95 °C, 246 mg, 86% yield.  $^1\text{H}$  NMR (400 MHz,  $\text{CDCl}_3$ )  $\delta$  7.33–7.29 (m, 3H), 7.19–7.17 (m, 2H), 3.49 (s, 3H), 2.69–2.63 (m, 2H), 2.45–2.38 (m, 2H), 2.22–2.10 (m, 2H), 1.53 (s, 3H);  $^{13}\text{C}$  NMR (101 MHz,  $\text{CDCl}_3$ )  $\delta$  195.2, 194.7, 171.1, 143.0, 140.8, 131.9, 128.4, 128.4, 128.2, 113.0, 51.8, 34.9, 31.2, 29.1, 25.5. HRMS (MALDI-Quadrupole-Orbitrap)  $m/z$ :  $[\text{M} + \text{Na}]^+$  Calcd for  $\text{C}_{17}\text{H}_{18}\text{O}_4\text{Na}^+$  309.1097; Found 309.1105. IR (KBr thin film,  $\text{cm}^{-1}$ ):  $\nu$  3735, 2360, 2341, 1715, 1266, 1171, 1101, 732, 702, 669.

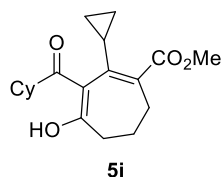

**methyl 3-(cyclohexanecarbonyl)-2-cyclopropyl-4-hydroxycyclohepta-1,3-diene-1-carboxylate (5i):** purified by flash chromatography on silica gel (petroleum ether/ethyl acetate, v:v = 5:1), colorless oil, 175 mg, 55% yield.  $^1\text{H}$  NMR (400 MHz,  $\text{CDCl}_3$ )  $\delta$  3.78 (s, 3H), 2.68–2.57 (m, 3H), 2.31–2.25 (m, 1H), 2.12–2.10 (m, 4H), 1.78–1.70 (m, 3H), 1.67–1.57 (m, 3H), 1.23–1.21 (m, 4H), 0.97–0.90 (m, 1H), 0.72–0.65 (m, 1H), 0.51–0.45 (m, 1H), 0.17–0.11 (m, 1H);  $^{13}\text{C}$  NMR (101 MHz,  $\text{CDCl}_3$ )  $\delta$  199.2, 192.9, 168.9, 150.3, 130.0, 108.5, 51.6, 45.5, 34.2, 30.8, 30.8, 27.7, 27.3, 26.4, 25.8, 25.4, 15.8, 8.2, 6.0. HRMS (MALDI-Quadrupole-Orbitrap)  $m/z$ :  $[\text{M} + \text{Na}]^+$  Calcd for  $\text{C}_{19}\text{H}_{26}\text{O}_4\text{Na}^+$  341.1723; Found 341.1728. IR (KBr thin film,  $\text{cm}^{-1}$ ):  $\nu$  3735, 2930, 2855, 2360, 2342, 1706, 1576, 1448, 1297, 1167, 1104, 961, 764, 735, 669.

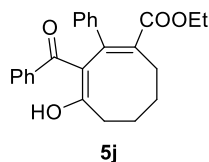

**ethyl (1E,3Z)-3-benzoyl-4-hydroxy-2-phenylcycloocta-1,3-diene-1-carboxylate (5j):** purified by flash chromatography on silica gel (petroleum ether/ethyl acetate, v:v = 5:1), white solid, mp 101–103 °C, 132 mg, 35% yield. <sup>1</sup>H NMR (400 MHz, CDCl<sub>3</sub>) δ 7.26–7.22 (m, 3H), 7.16–7.12 (m, 2H), 7.00–6.91 (m, 3H), 6.74–6.72 (m, 2H), 3.96–3.81 (m, 2H), 3.16–3.11 (m, 1H), 2.72–2.58 (m, 2H), 2.45–2.38 (m, 1H), 2.12–2.04 (m, 1H), 1.97–1.90 (m, 1H), 1.69–1.60 (m, 1H), 1.41–1.30 (m, 1H), 0.78 (t, *J* = 7.1 Hz, 3H); <sup>13</sup>C NMR (101 MHz, CDCl<sub>3</sub>) δ 194.4, 191.4, 171.2, 141.0, 140.8, 138.3, 133.8, 130.8, 128.3, 127.9, 127.4, 127.4, 127.2, 112.8, 60.8, 35.0, 32.1, 24.5, 24.4, 13.7. HRMS (MALDI-Quadrupole-Orbitrap) *m/z*: [M + Na]<sup>+</sup> Calcd for C<sub>24</sub>H<sub>24</sub>O<sub>4</sub>Na<sup>+</sup> 399.1567; Found 399.1574. IR (KBr thin film, cm<sup>-1</sup>): ν 3735, 2360, 2342, 1705, 1559, 1264, 1154, 1107, 732, 696, 669.

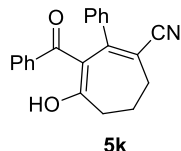

**3-benzoyl-4-hydroxy-2-phenylcyclohepta-1,3-diene-1-carbonitrile (5k):** purified by flash chromatography on silica gel (petroleum ether/ethyl acetate, v:v = 5:1), white solid, mp 171–172 °C, 276 mg, 88% yield. <sup>1</sup>H NMR (400 MHz, CDCl<sub>3</sub>) δ 7.22–7.19 (m, 3H), 7.14–7.10 (m, 4H), 7.06–7.04 (m, 3H), 2.71–2.69 (m, 2H), 2.61–2.46 (m, 2H), 2.44–2.38 (m, 2H); <sup>13</sup>C NMR (101 MHz, CDCl<sub>3</sub>) δ 195.4, 191.0, 155.8, 138.0, 136.5, 131.4, 129.1, 128.9, 127.9, 127.9, 127.8, 120.3, 111.3, 108.4, 35.3, 31.0, 30.4. HRMS (MALDI-Quadrupole-Orbitrap) *m/z*: [M + Na]<sup>+</sup> Calcd for C<sub>21</sub>H<sub>17</sub>NO<sub>2</sub>Na<sup>+</sup> 338.1151; Found 338.1153. IR (KBr thin film, cm<sup>-1</sup>): ν 3051, 2969, 2197, 1562, 1441, 761, 691.

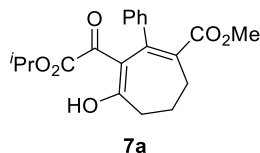

**methyl 4-hydroxy-3-(2-isopropoxy-2-oxoacetyl)-2-phenylcyclohepta-1,3-diene-1-carboxylate (7a):** purified by flash chromatography on silica gel (petroleum ether/ethyl acetate, v:v = 5:1), brown oil, 87 mg, 81% yield. <sup>1</sup>H NMR (400 MHz, CDCl<sub>3</sub>) δ 15.82 (s, 1H), 7.14–7.13 (m, 3H), 7.01–6.99 (m, 2H), 4.31–4.25 (m, 1H), 3.36 (s, 3H), 2.59–2.37 (m, 4H), 2.20–2.13 (m, 2H), 0.95–0.68 (m, 6H); <sup>13</sup>C NMR (101 MHz, CDCl<sub>3</sub>) δ 195.5, 183.7, 170.4, 161.9, 142.5, 139.5, 131.3, 129.8, 128.5, 127.9, 112.1, 70.5, 51.8, 34.5,



32.0, 29.0, 21.3. HRMS (MALDI-Quadrupole-Orbitrap)  $m/z$ :  $[M + Na]^+$  Calcd for  $C_{20}H_{22}O_6Na^+$  381.1309; Found 381.1316 IR (KBr thin film,  $cm^{-1}$ ):  $\nu$  3735, 2984, 2360, 2342, 1732, 1559, 1243, 1200, 1100, 948, 765, 733, 701, 669.

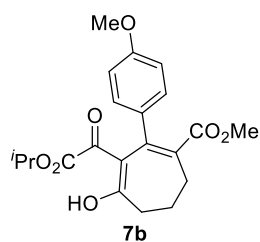

### methyl

#### **4-hydroxy-3-(2-isopropoxy-2-oxoacetyl)-2-(4-methoxyphenyl)cyclohepta-1,3-diene-1-carboxylate (7b):**

purified by flash chromatography on silica gel (petroleum ether/ethyl acetate,  $v:v = 5:1$ ), white solid, mp 95–97 °C, 56 mg, 72% yield.  $^1H$  NMR (400 MHz,  $CDCl_3$ )  $\delta$  15.86 (s, 1H), 7.06–7.03 (m, 2H), 6.80–6.77 (m, 2H), 4.48–4.42 (m, 1H), 3.78 (s, 3H), 3.52 (s, 3H), 2.72–2.47 (m, 4H), 2.30–2.26 (m, 2H), 1.09–0.84 (m, 6H);  $^{13}C$  NMR (101 MHz,  $CDCl_3$ )  $\delta$  195.0, 184.3, 170.5, 162.0, 159.9, 142.6, 132.0, 131.3, 129.8, 113.3, 112.4, 70.5, 55.4, 51.8, 34.4, 32.3, 28.9, 21.3. HRMS (MALDI-Quadrupole-Orbitrap)  $m/z$ :  $[M + Na]^+$  Calcd for  $C_{21}H_{24}O_7Na^+$  411.1414; Found 411.1419. IR (KBr thin film,  $cm^{-1}$ ):  $\nu$  3734, 2983, 2360, 2342, 1732, 1508, 1248, 1175, 1100, 834, 733, 702.

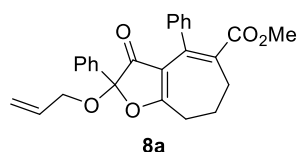

### methyl

#### **2-(allyloxy)-3-oxo-2,4-diphenyl-3,6,7,8-tetrahydro-2H-cyclohepta[b]furan-5-carboxylate (8a):**

purified by flash chromatography on silica gel (petroleum ether/ethyl acetate,  $v:v = 3:1$ ), yellow oil, 23 mg, 55% yield.  $^1H$  NMR (400 MHz,  $CDCl_3$ )  $\delta$  7.95–7.92 (m, 2H), 7.61–7.57 (m, 1H), 7.51–7.47 (m, 2H), 7.36–7.27 (m, 5H), 5.09–5.00 (m, 1H), 4.86 (dd,  $J = 10.4, 1.2$  Hz, 1H), 4.70 (dd,  $J = 17.1, 1.5$  Hz, 1H), 3.93 (d,  $J = 5.7$  Hz, 2H), 3.52 (s, 3H), 2.69–2.62 (m, 4H), 2.04–1.97 (m, 2H);  $^{13}C$  NMR (101 MHz,  $CDCl_3$ )  $\delta$  200.4, 191.0, 170.3, 164.0, 142.4, 140.7, 135.3, 134.0, 131.8, 130.7, 129.2, 128.3, 127.9, 127.7, 121.4, 119.1, 77.4, 71.1, 51.9, 38.7, 28.8, 25.6. HRMS (MALDI-Quadrupole-Orbitrap)  $m/z$ :  $[M + Na]^+$  Calcd for  $C_{26}H_{24}O_5Na^+$  439.1516; Found 439.1524. IR (KBr thin film,  $cm^{-1}$ ):  $\nu$  2949, 1712, 1669, 1553, 1264, 1086, 731, 701.

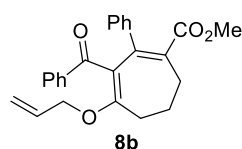

**methyl 4-(allyloxy)-3-benzoyl-2-phenylcyclohepta-1,3-diene-1-carboxylate (8b):** purified by flash chromatography on silica gel (petroleum ether/ethyl acetate, v:v = 5:1), white solid, mp 103–105 °C, 87 mg, 75% yield. <sup>1</sup>H NMR (600 MHz, CDCl<sub>3</sub>) δ 7.42–7.40 (m, 2H), 7.30–7.26 (m, 1H), 7.17–7.14 (m, 2H), 6.97–6.96 (m, 3H), 6.84–6.83 (m, 2H), 5.67–5.61 (m, 1H), 5.04 (dd, *J* = 20.3, 17.6 Hz, 2H), 4.27 (d, *J* = 4.9 Hz, 2H), 3.30 (s, 3H), 2.59 (t, *J* = 14.3 Hz, 2H), 2.46 (t, *J* = 14.2 Hz, 2H), 2.34–2.29 (m, 2H); <sup>13</sup>C NMR (101 MHz, CDCl<sub>3</sub>) δ 195.1, 170.7, 169.8, 148.9, 139.6, 139.5, 132.6, 132.1, 131.9, 128.7, 128.4, 128.1, 127.6, 127.6, 120.4, 117.8, 71.1, 51.6, 37.9, 29.7, 28.7. HRMS (MALDI-Quadrupole-Orbitrap) *m/z*: [M + Na]<sup>+</sup> Calcd for C<sub>25</sub>H<sub>24</sub>O<sub>4</sub>Na<sup>+</sup> 411.1567; Found 411.1574. IR (KBr thin film, cm<sup>-1</sup>): ν 2360, 2342, 1705, 1234, 765, 669.

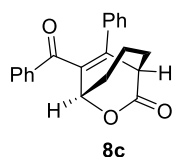

**(1R,5S)-9-benzoyl-8-phenyl-6-oxabicyclo[3.2.2]non-8-en-7-one (8c):** purified by flash chromatography on silica gel (petroleum ether/ethyl acetate, v:v = 5:1), white solid, mp 134–136 °C, 27 mg, 42% yield. <sup>1</sup>H NMR (400 MHz, CDCl<sub>3</sub>) δ 7.62–7.60 (m, 2H), 7.34–7.30 (m, 1H), 7.19–7.15 (m, 2H), 7.13–7.09 (m, 5H), 5.30 (dd, *J* = 5.0, 1.7 Hz, 1H), 3.74 (t, *J* = 4.0 Hz, 1H), 2.28–2.20 (m, 1H), 2.06–1.97 (m, 1H), 1.96–1.88 (m, 4H); <sup>13</sup>C NMR (151 MHz, CDCl<sub>3</sub>) δ 195.9, 175.0, 144.5, 135.9, 135.9, 133.6, 133.2, 129.4, 129.4, 128.6, 128.4, 128.3, 78.4, 48.0, 27.9, 23.7, 20.2. HRMS (MALDI-Quadrupole-Orbitrap) *m/z*: [M + Na]<sup>+</sup> Calcd for C<sub>21</sub>H<sub>18</sub>O<sub>3</sub>Na<sup>+</sup> 341.1148; Found 341.1147. [α]<sub>D</sub><sup>29</sup>: +133.4 (*c* 0.36, CHCl<sub>3</sub>); HPLC analysis: 98% *ee* (Chiralcel OD-H, 5:95 <sup>i</sup>PrOH/Hexane, 1 mL/min), R<sub>t</sub> (major) = 10.5 min, R<sub>t</sub> (minor) = 8.2 min. IR (KBr thin film, cm<sup>-1</sup>): ν 3054, 1699, 1605, 1488, 1408, 1264, 1092, 1014, 734, 703.

## Reference

- Kong, X.; Song, J.; Liu, J.; Meng, M.; Yang, S.; Zeng, M.; Zhan, X.; Li, C.; Fang, X. *Chem. Comm.* **2018**, *54*, 4266–4269.
- Zhang, Z.; Jiang, X. *Org. Lett.* **2014**, *16*, 4400–4403.
- Chen, Z.; Yu, F.; Liu, R.; Lin, X.; Yang, S.; Liu, J.; Chen, B.; Nagaraju, S.; Zeng, M.; Ding, C.; Fang, X. *Org. Lett.* **2020**, *22*, 2381–2385.
- Kong, X.; Yu, F.; Chen, Z.; Gong, F.; Yang, S.; Liu, J.; Luo, B.; Fang, X. *Sci. China Chem.* **2021**, *64*, 991–998.
- Chen, L.; Niu, S.; Lan, S.; Liu, W.; Yang, S.; Fang, X. *Green Chem.* **2022**, *24*, 3623–3628.

6. Yan, W.; Wang, Q.; Chen, Y.; Petersen, J. L.; Shi, X. *Org. Lett.* **2010**, *12*, 3308–3311.
7. Xu, C.; Xu, M.; Yang, L.; Li, C. *J. Org. Chem.* **2012**, *77*, 3010–3016.
8. Yao, W.; Pan, L.; Zhang, Y.; Wang, G.; Wang, X.; Ma, C. *Angew. Chem. Int. Ed.* **2010**, *49*, 9210–9214.
9. Sinha, D.; Biswas, A.; Singh, V. *Org. Lett.* **2015**, *17*, 3302–3305.

## VII. <sup>1</sup>H NMR and <sup>13</sup>C NMR spectra of products

CL20220325-1  
single\_pulse

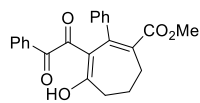

400 MHz, acetone-d<sub>6</sub>

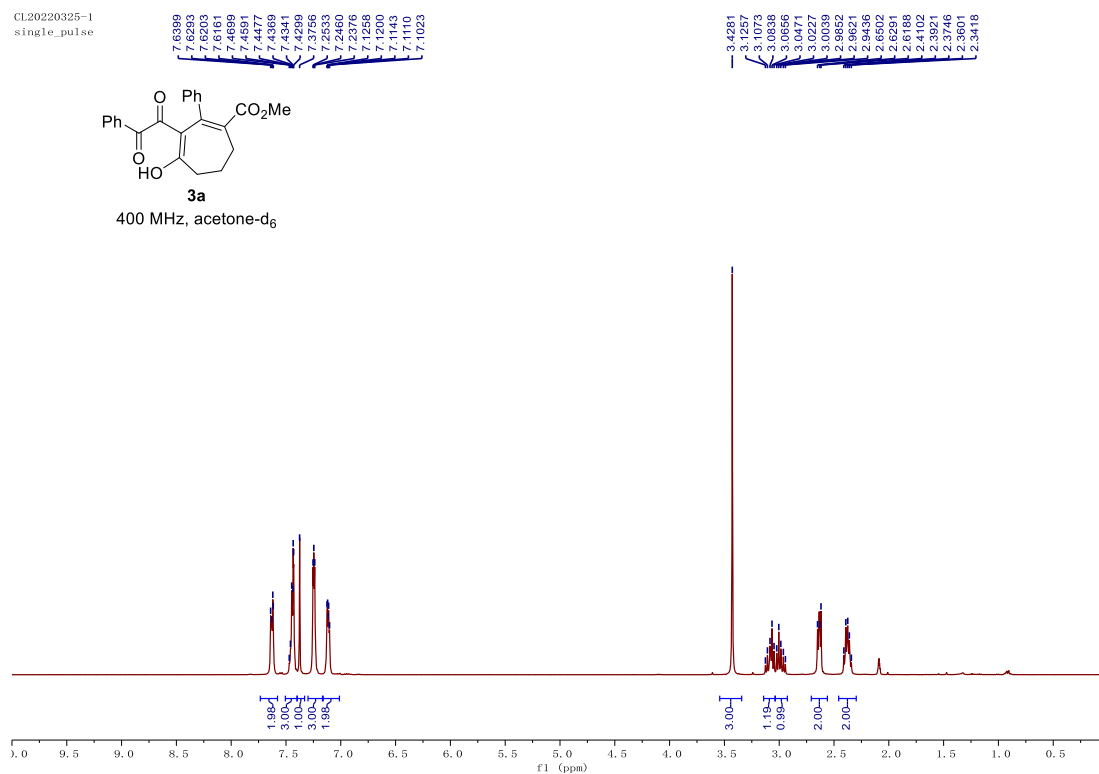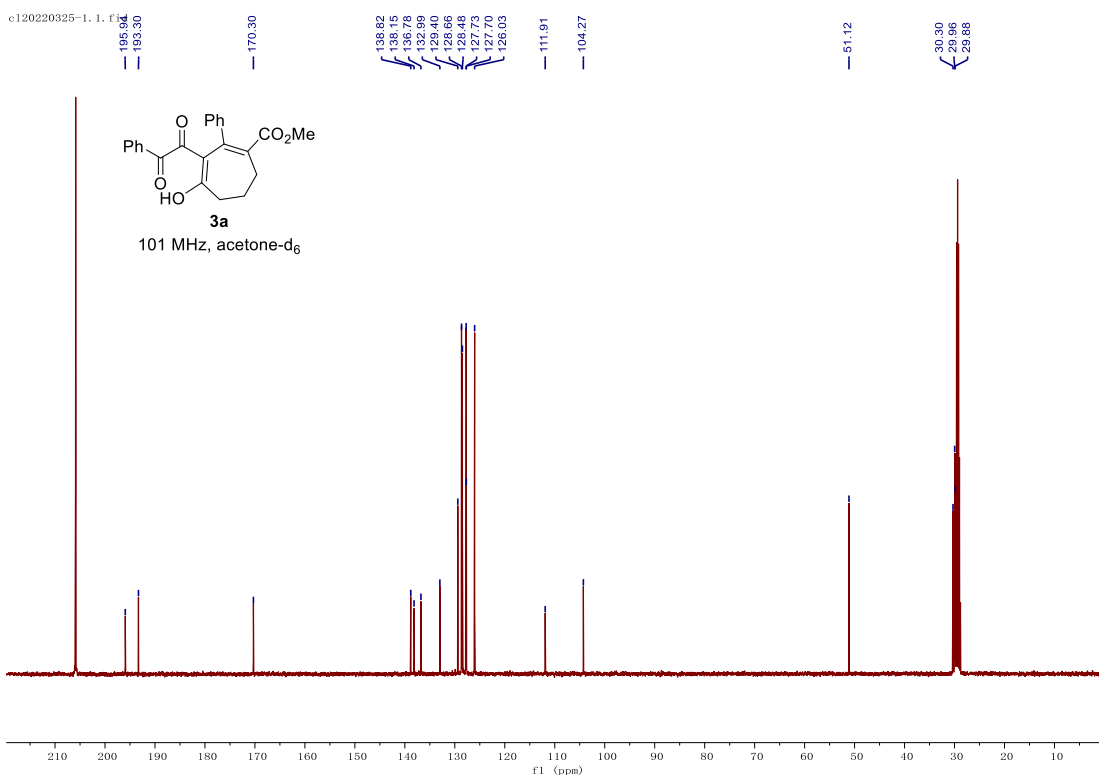

c120220516-Cl, 2, F1d

8.5709

7.4806  
7.4665  
7.4471  
7.4371  
7.3988  
7.3910  
7.0191  
7.0508

3.4421  
3.1130  
3.0776  
3.0776  
3.0521  
3.0337  
2.9664  
2.9480  
2.9285  
2.8664  
2.8371  
2.5867  
2.5723  
2.5656  
2.3055  
2.2876  
2.2770  
2.2572  
2.2393

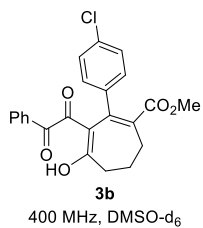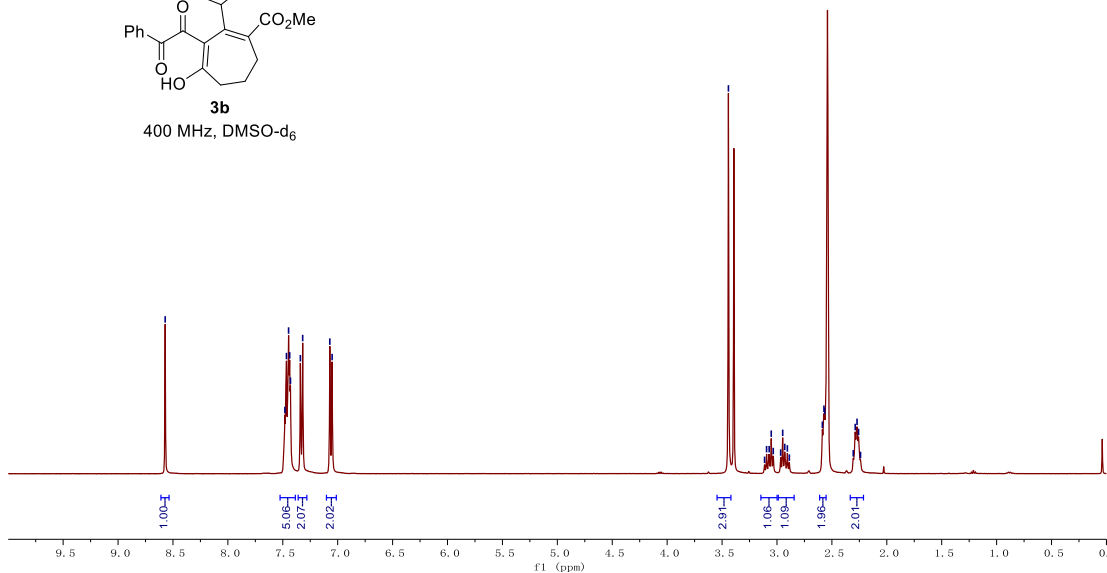

CL20220520-Cl

single pulse decoupled gated NOE

198.17  
187.66

170.31

137.97  
137.36  
136.96  
133.39  
133.04  
132.72  
130.07  
129.37  
128.54  
126.45

111.67

105.25

52.47

30.62  
30.35  
30.19

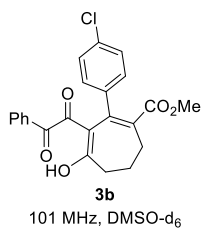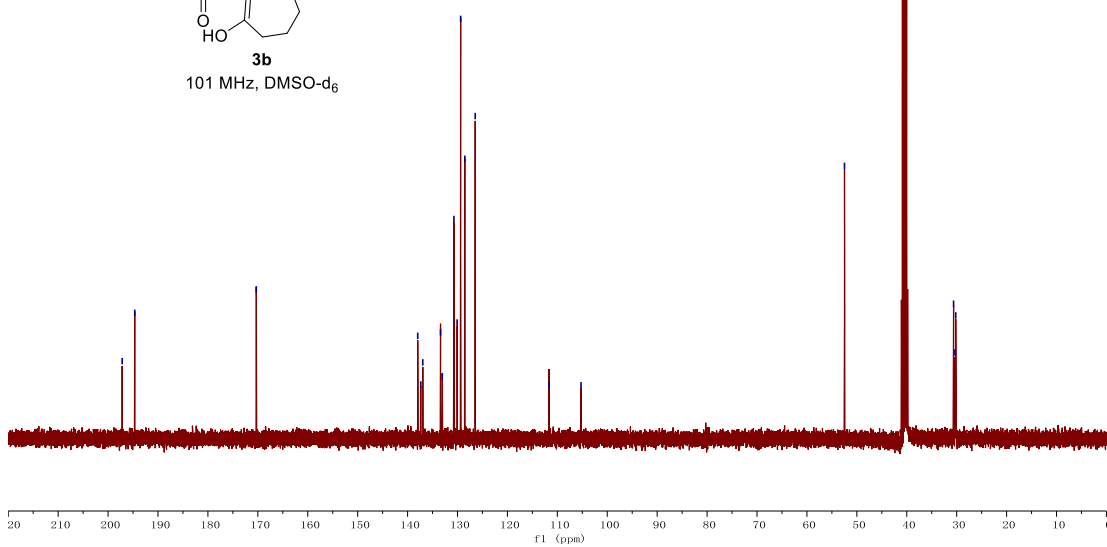

CL2022\_05\_16-0Me  
single\_pulse

8.56689  
7.5131  
7.5068  
7.5004  
7.4882  
7.4813  
7.4696  
7.4588  
7.4453  
7.4352  
6.9978  
6.9908  
6.9859  
6.9740  
6.9691  
6.9647  
6.8348  
6.8298  
6.8177  
6.8129  
6.8056

3.7570

3.4562  
3.0592  
3.0159  
2.9965  
2.9778  
2.9608  
2.9474  
2.9321  
2.5445  
2.5403  
2.5358  
2.5310  
2.3177  
2.3004  
2.2849  
2.2663

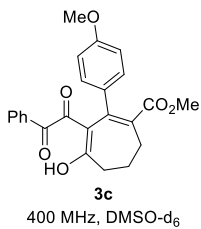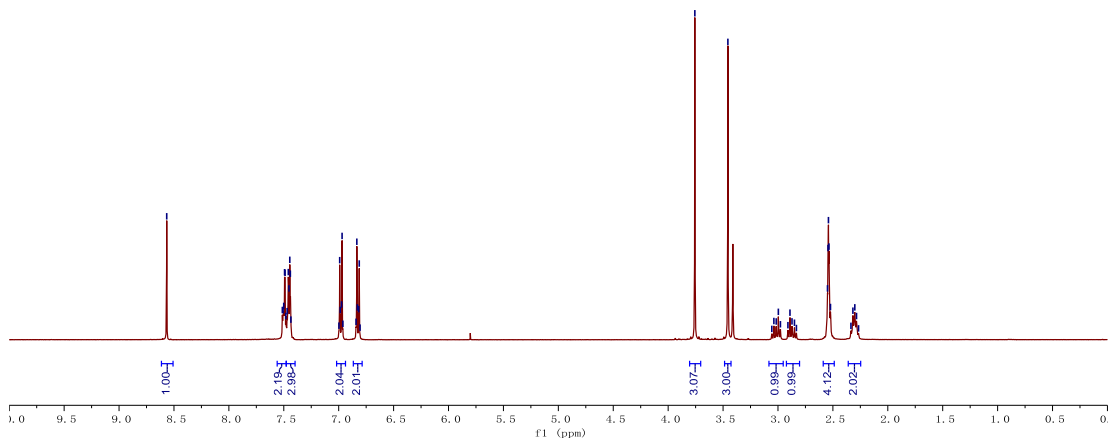

c120220516-0Me\_2

197.00  
194.26  
171.07  
159.74  
138.27  
137.08  
131.80  
130.96  
130.04  
129.39  
126.44  
113.96  
112.09  
105.45

55.94  
52.37

31.48  
30.41  
30.04

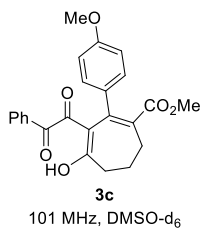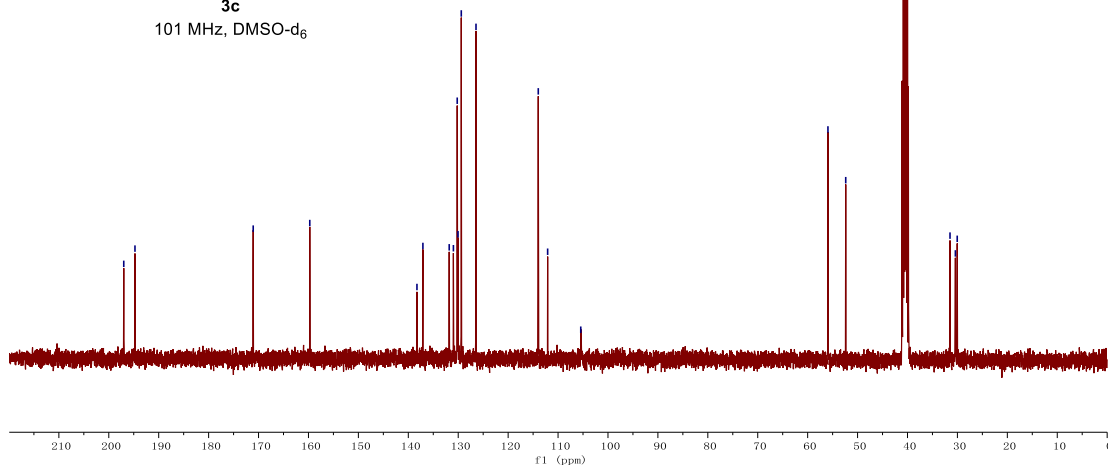

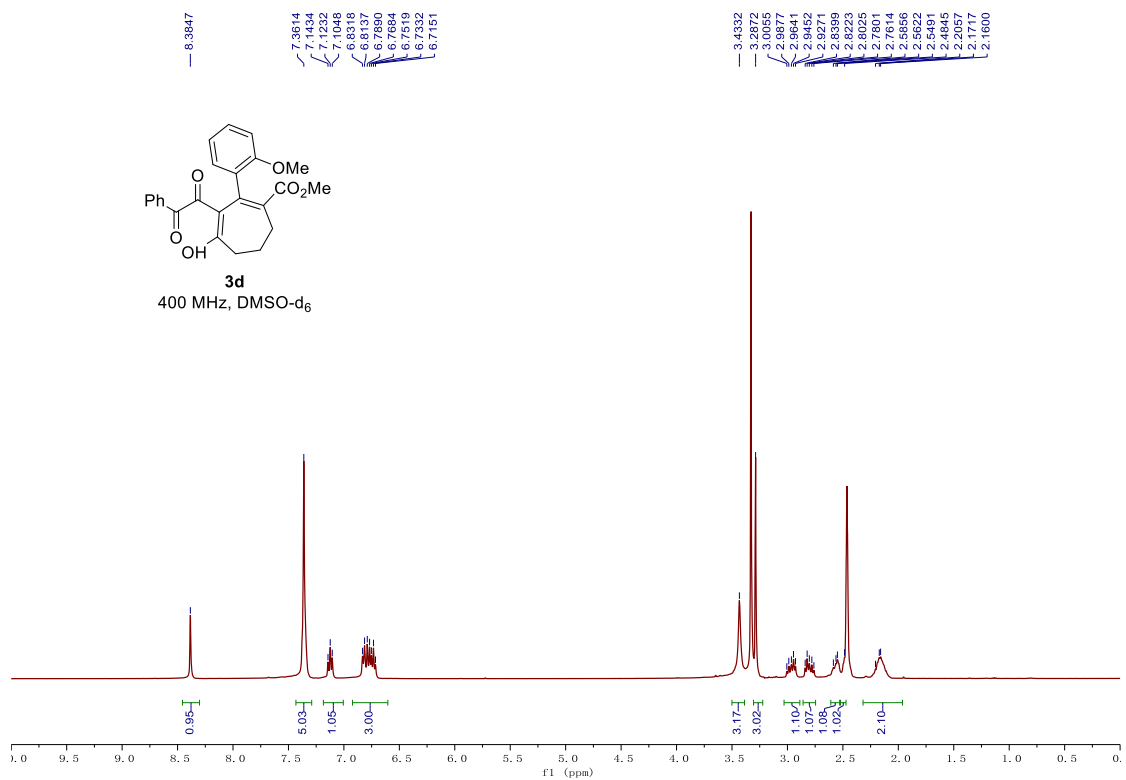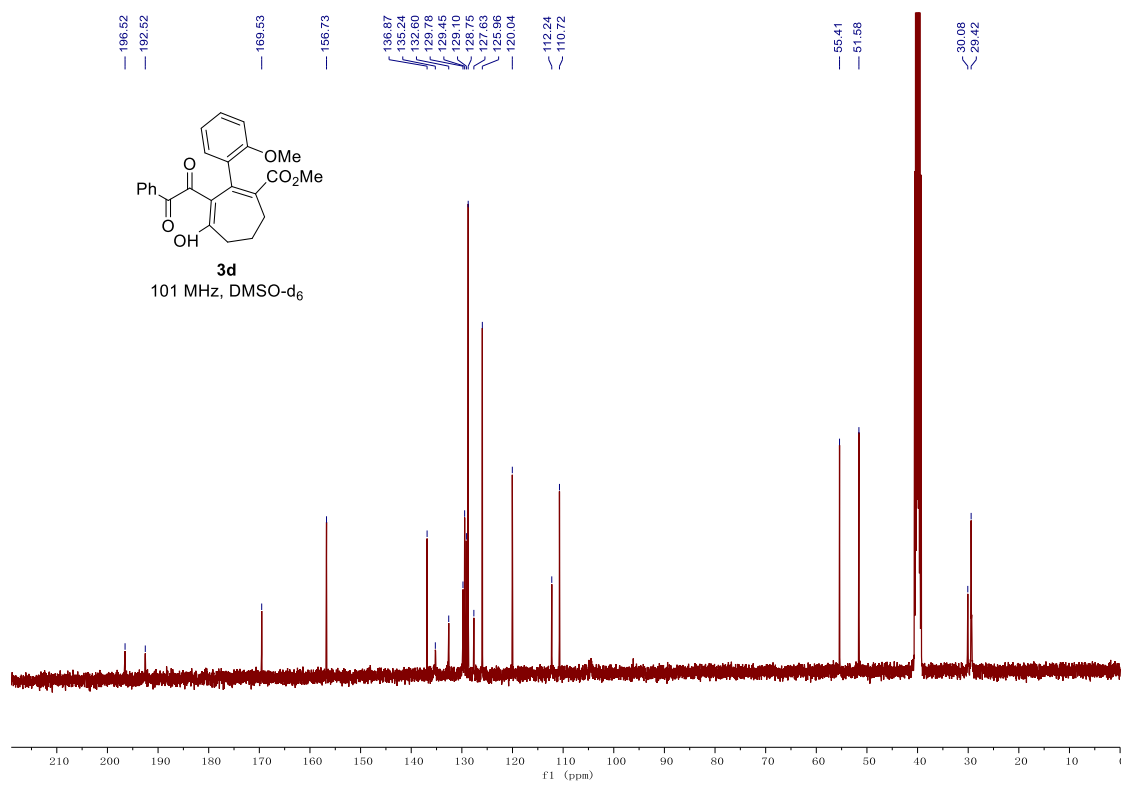

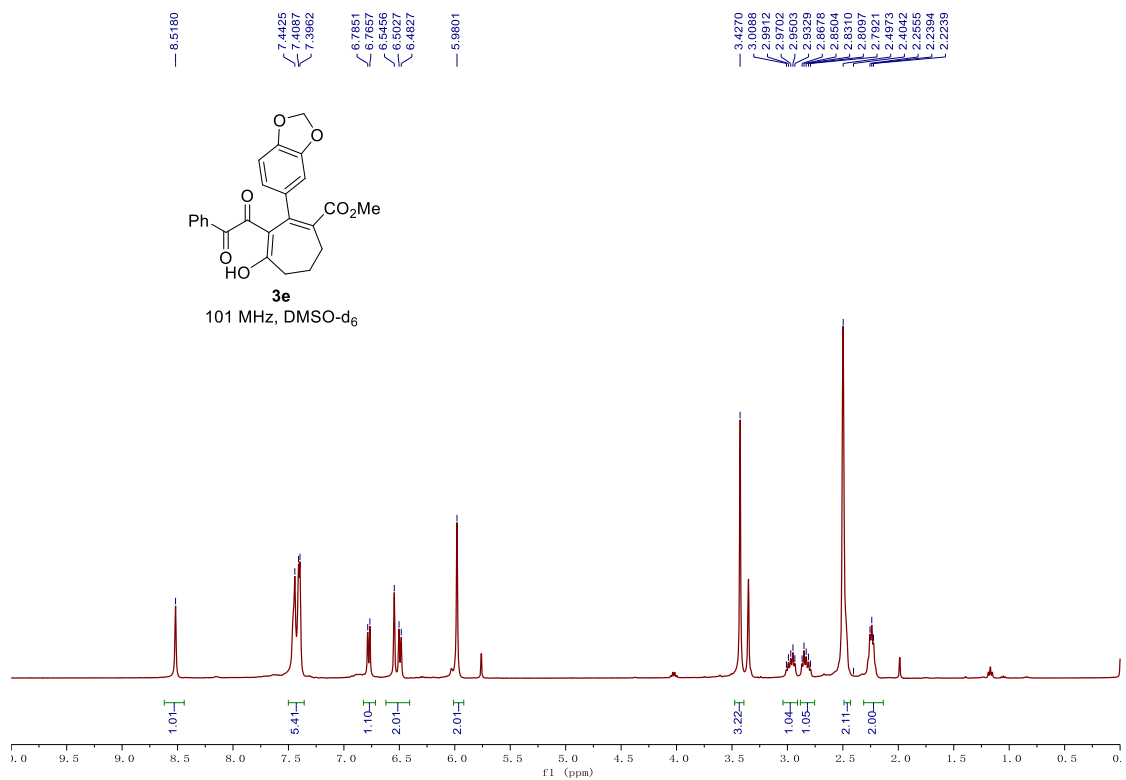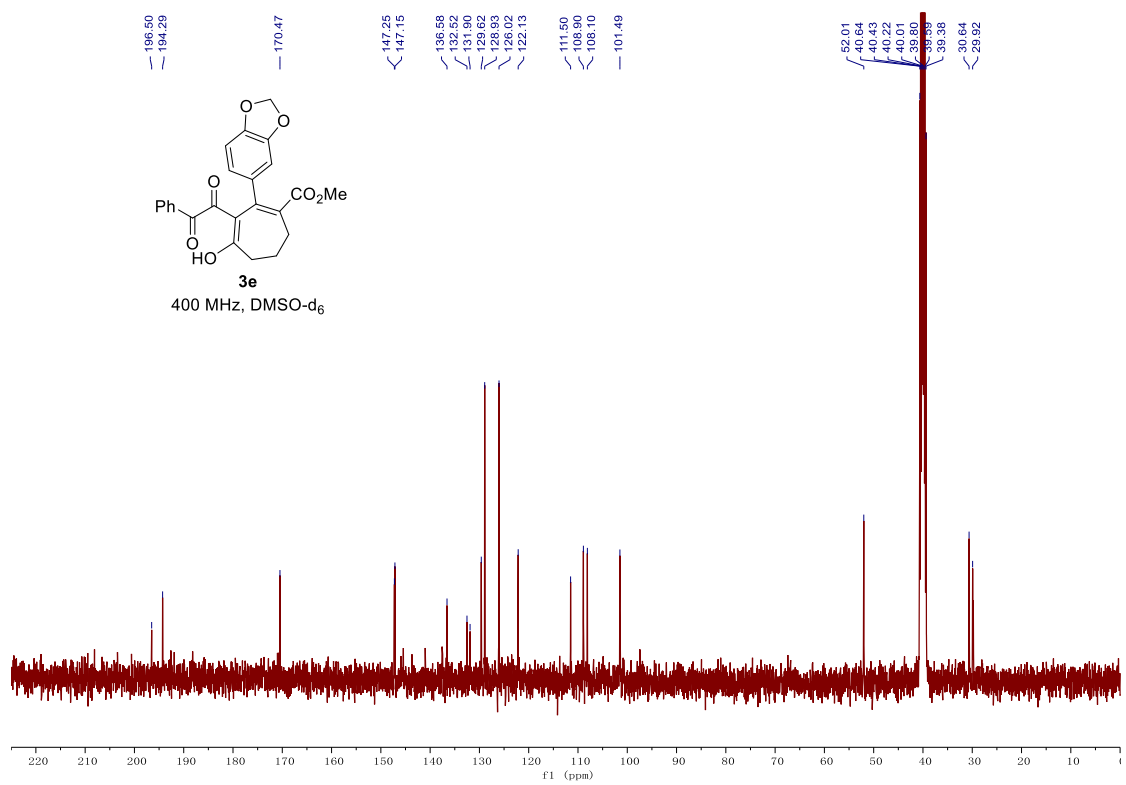



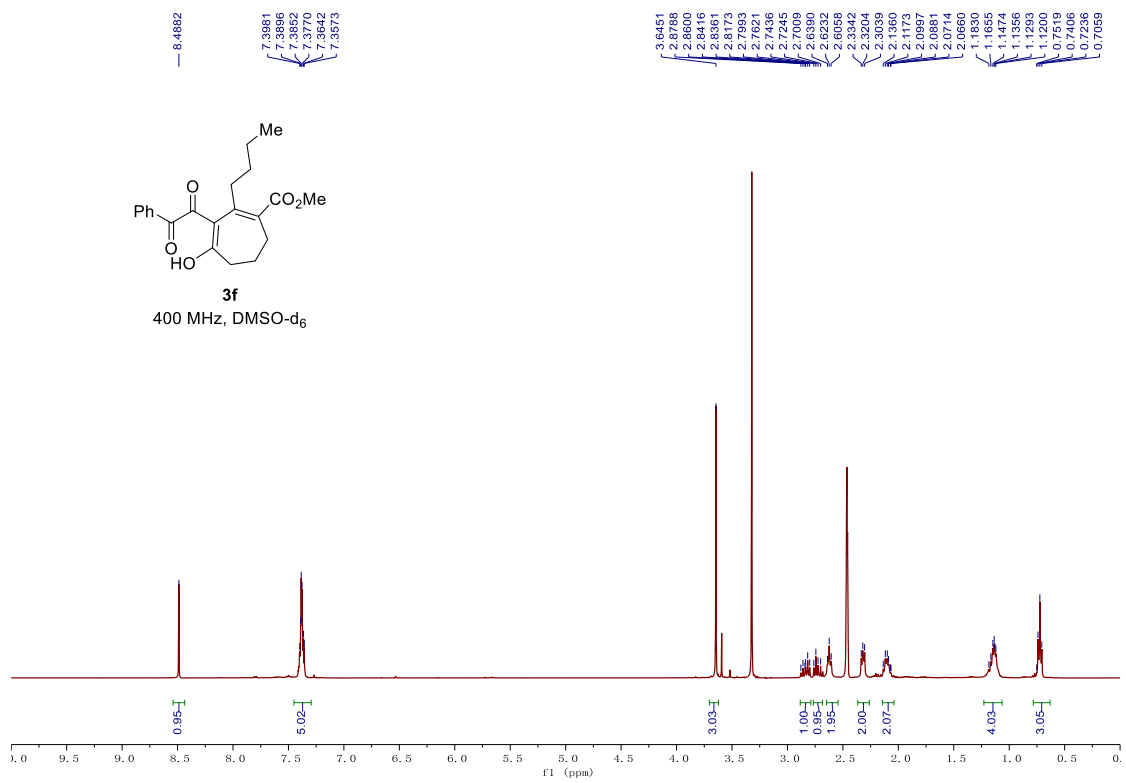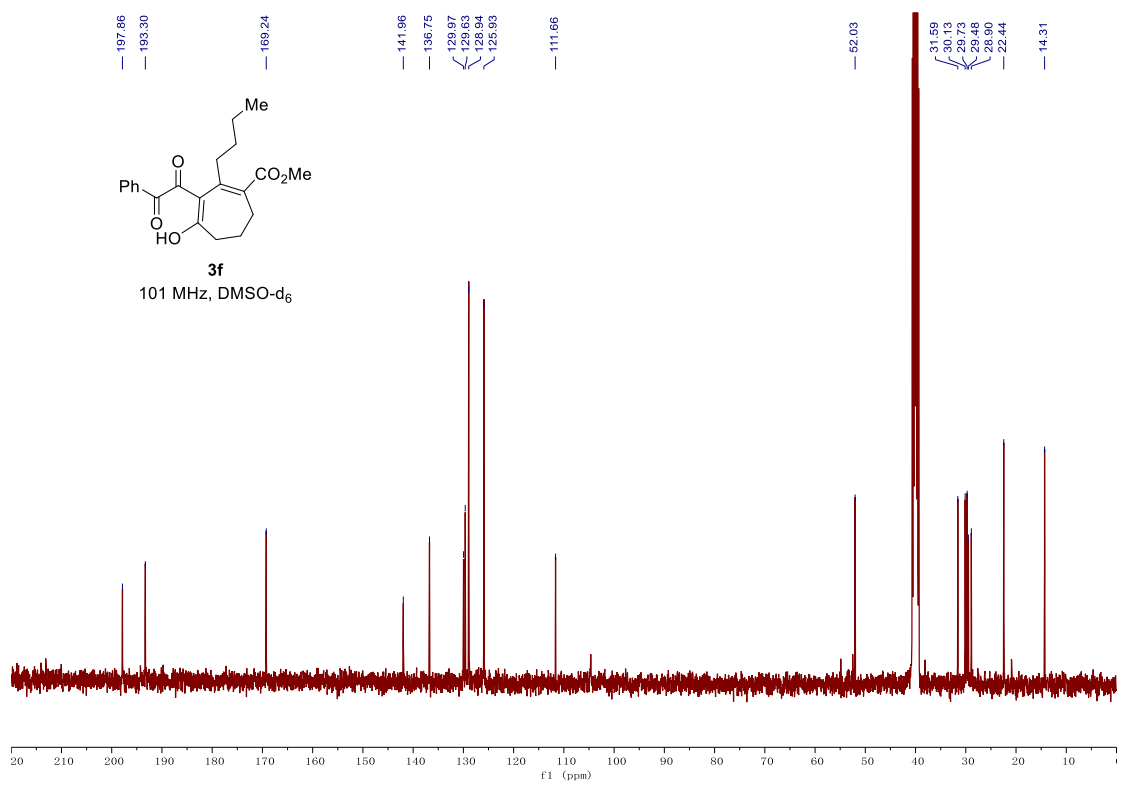

c120220503-Br, 1, f1d

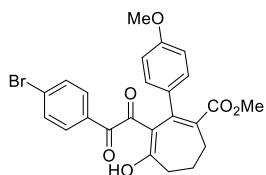

**3g**

400 MHz, acetone-d<sub>6</sub>

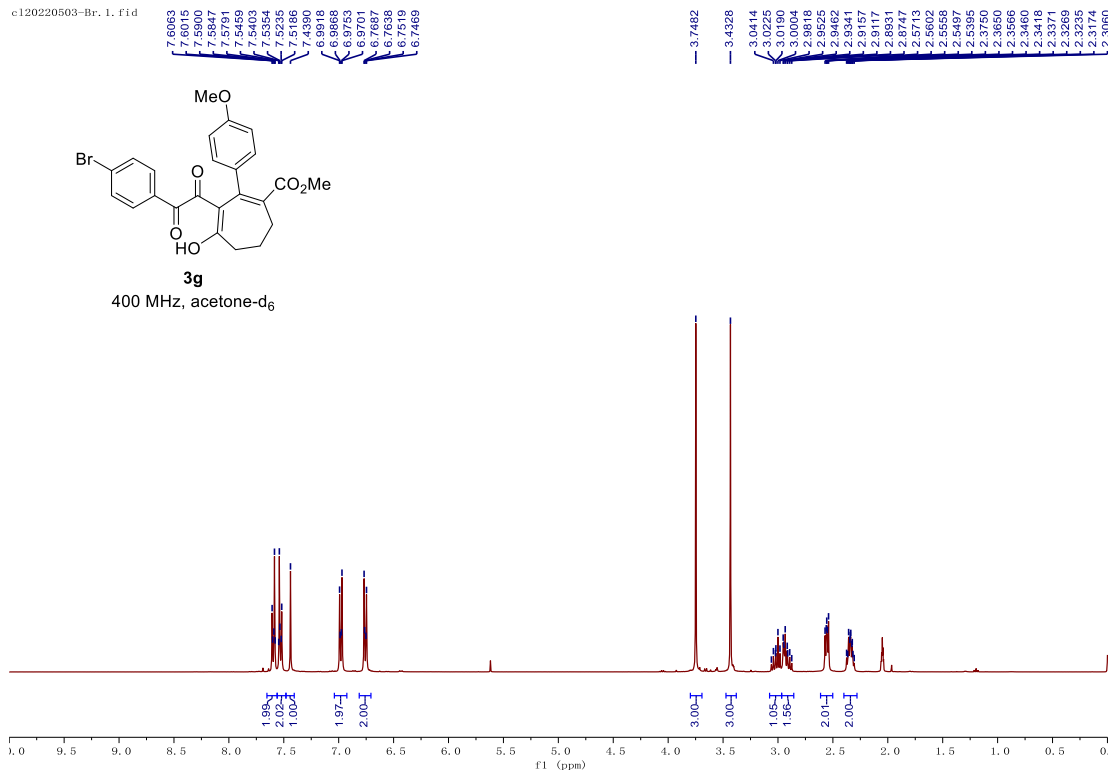

c120220503-Br, 2,

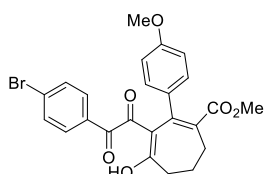

**3g**

101 MHz, acetone-d<sub>6</sub>

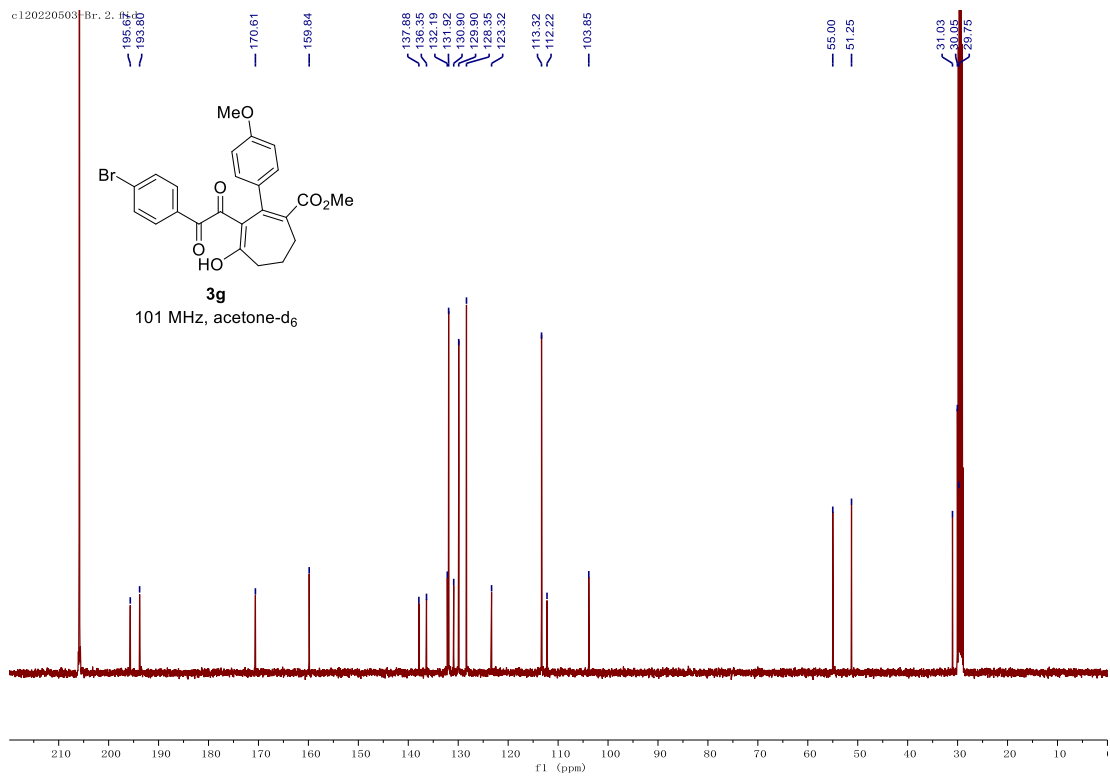

CL20220512-OMe. 1. f1d

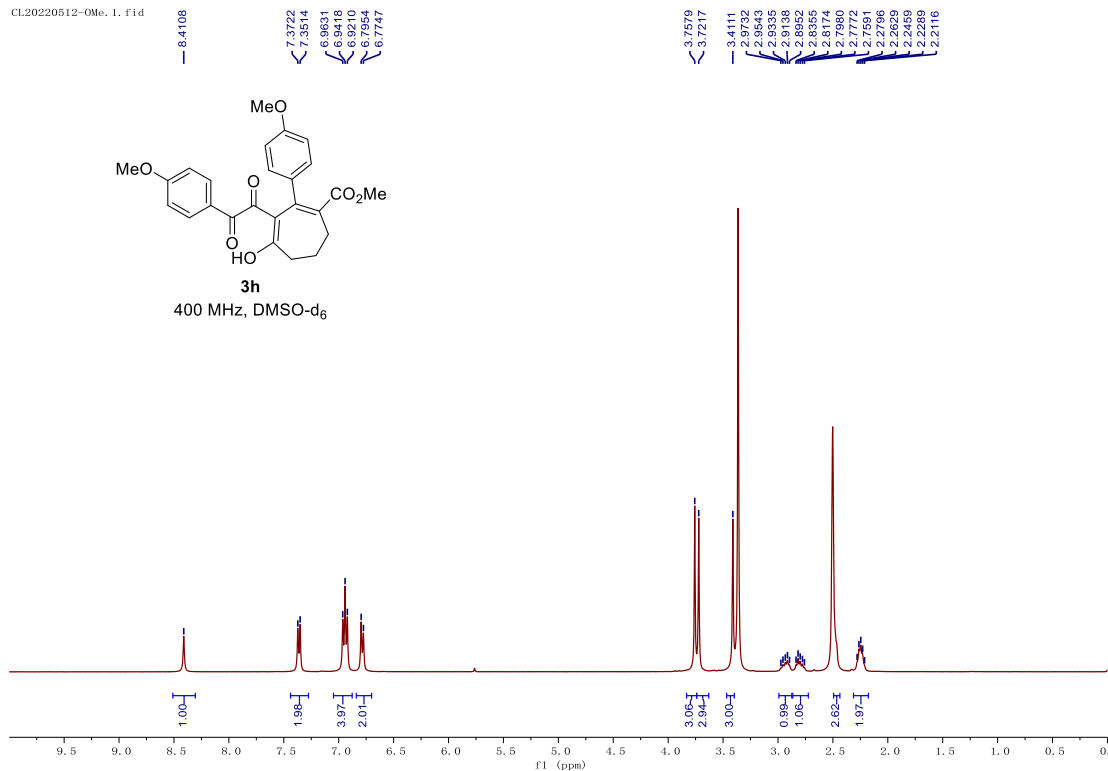

CL20220514-OMe  
single pulse decoupled gated NOE

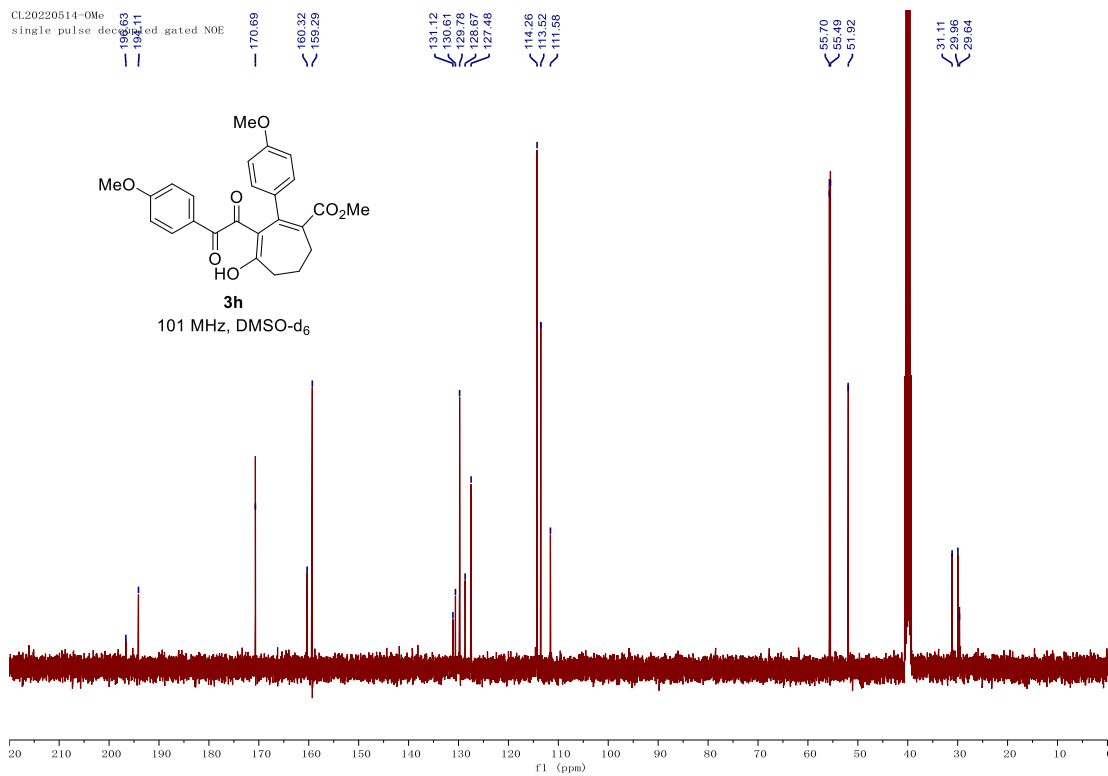

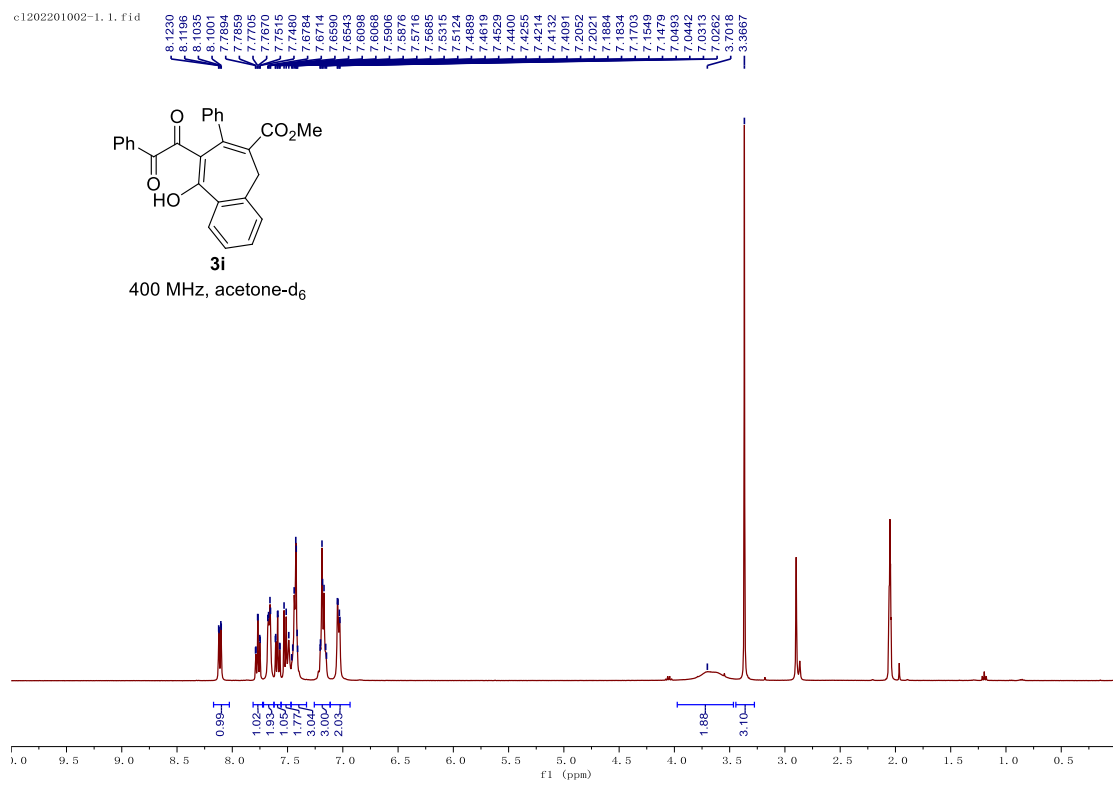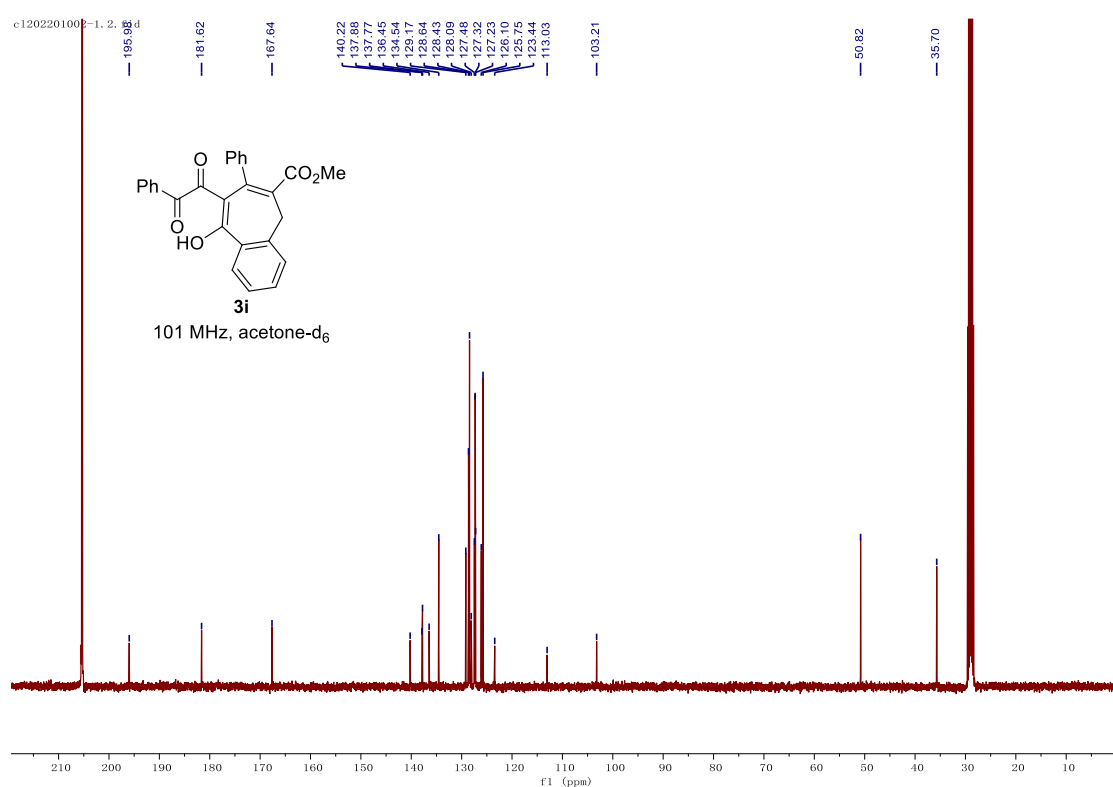

CL20220405-S  
single\_pulse

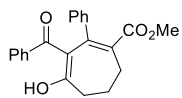

**5a**  
400 MHz, CDCl<sub>3</sub>

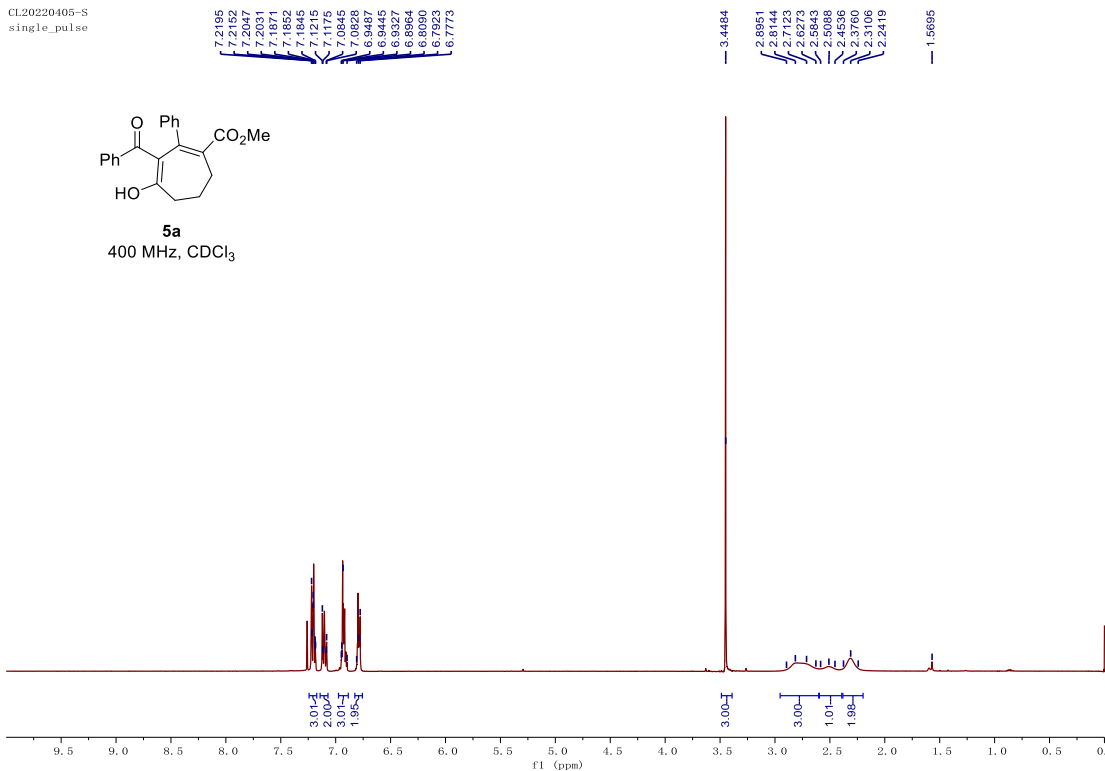

c120220516-Ph. 1.

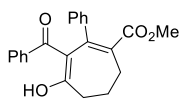

**5a**  
101 MHz, CDCl<sub>3</sub>

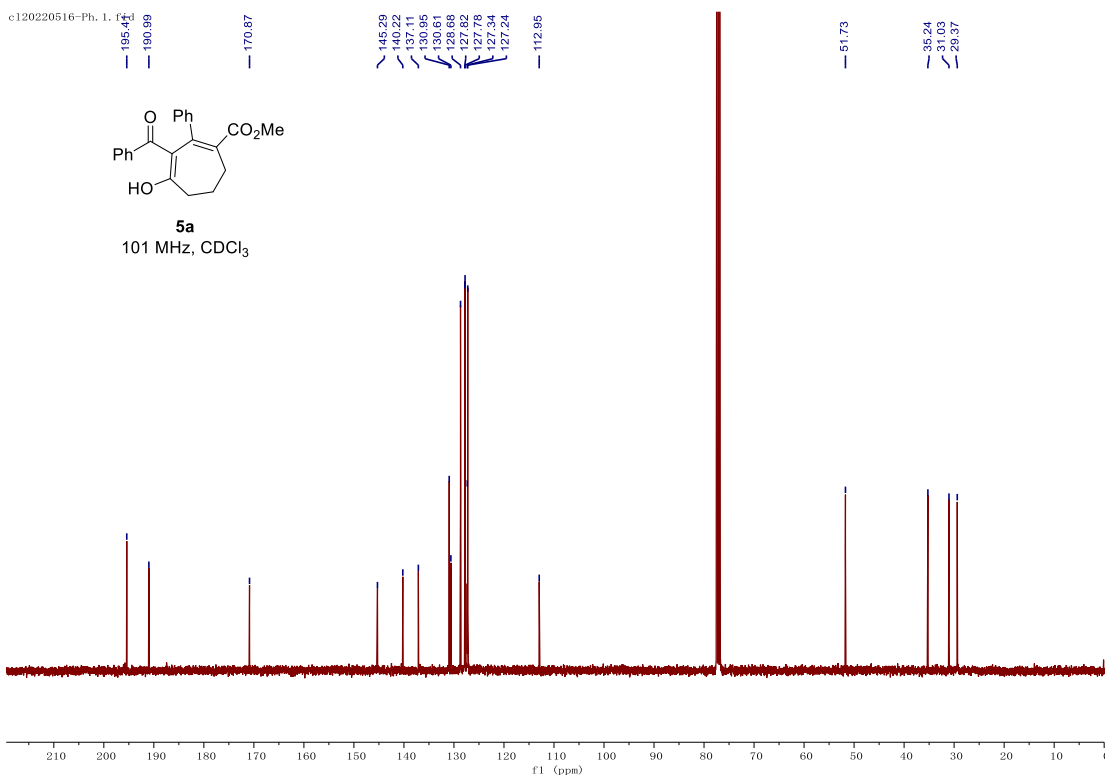

c120220501-1.1.fid

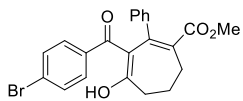

**5b**  
400 MHz, CDCl<sub>3</sub>

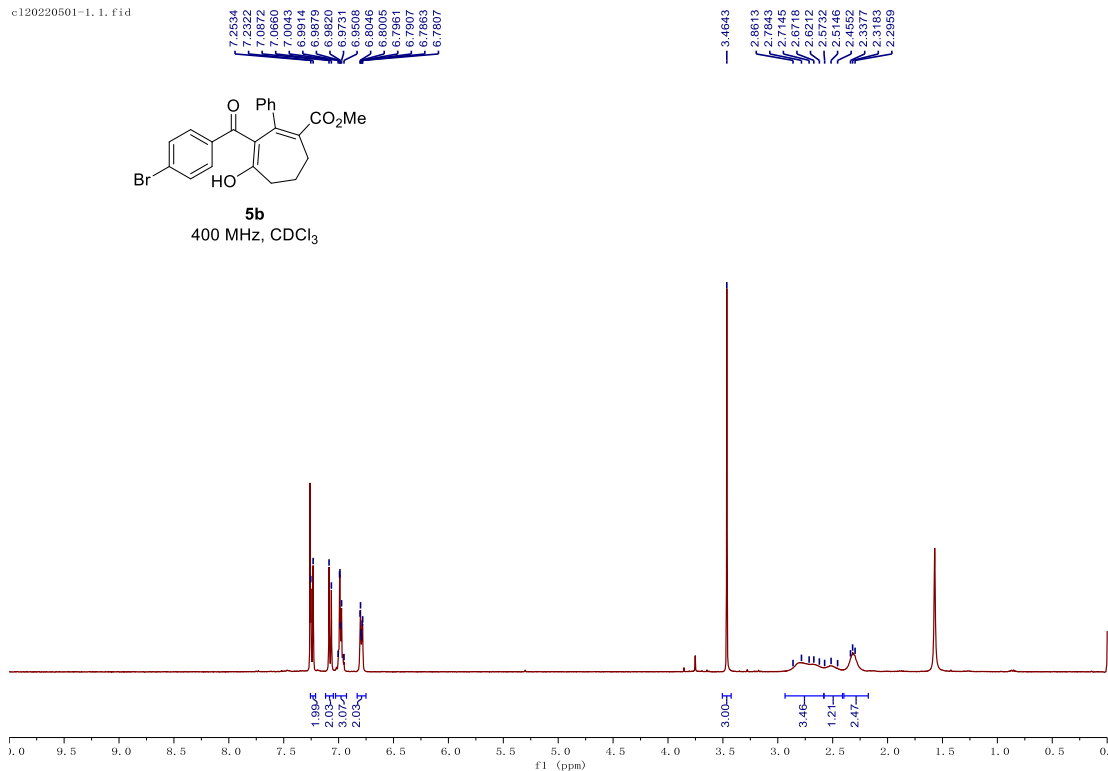

c120220501-1.2.fid

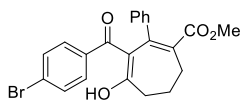

**5b**  
101 MHz, CDCl<sub>3</sub>

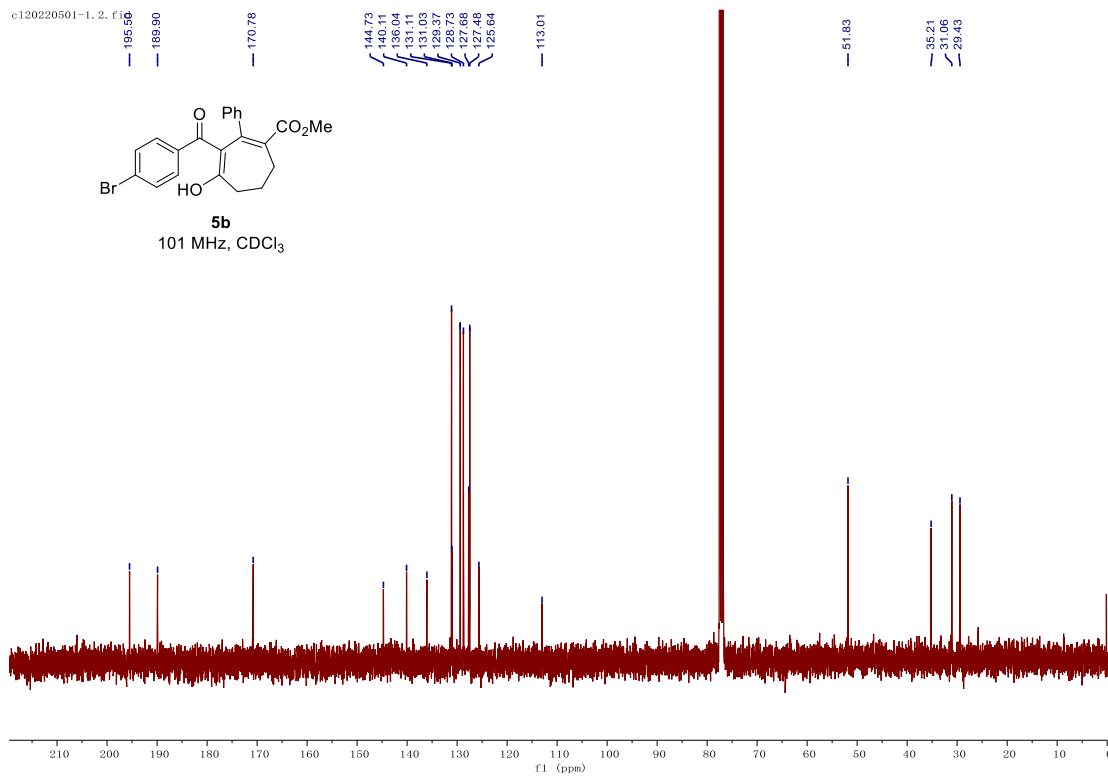

c120220508-1.3.fid

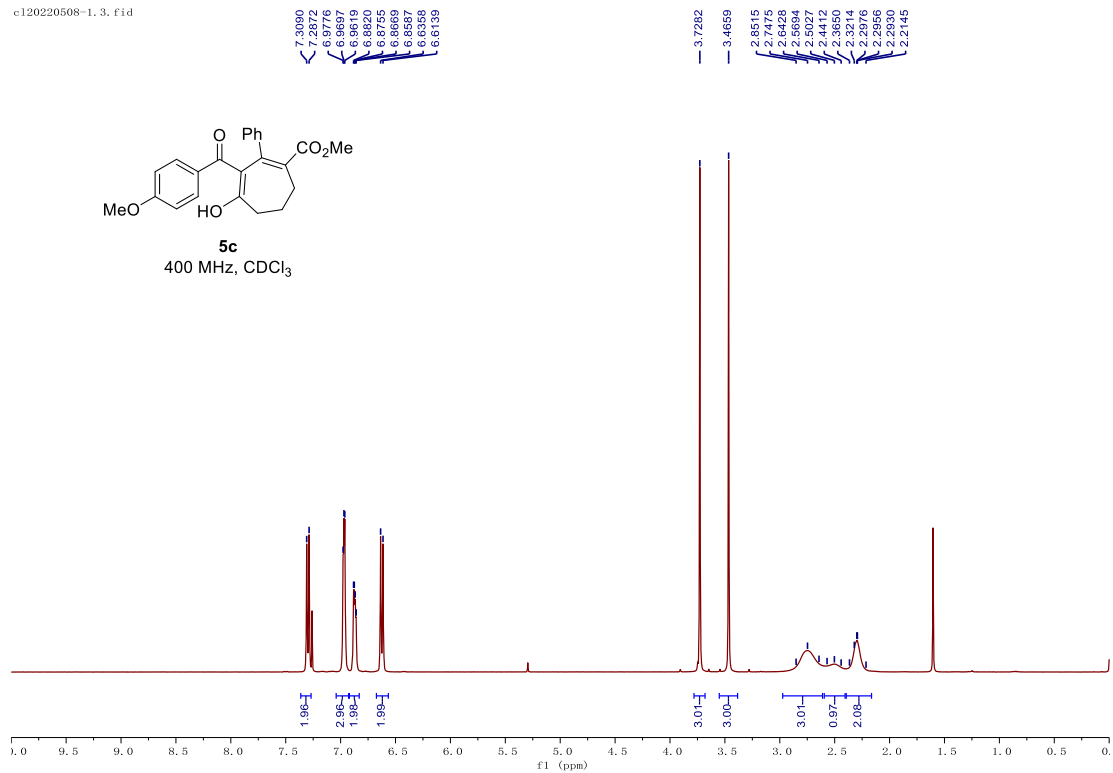

c120220508-1.4.fid

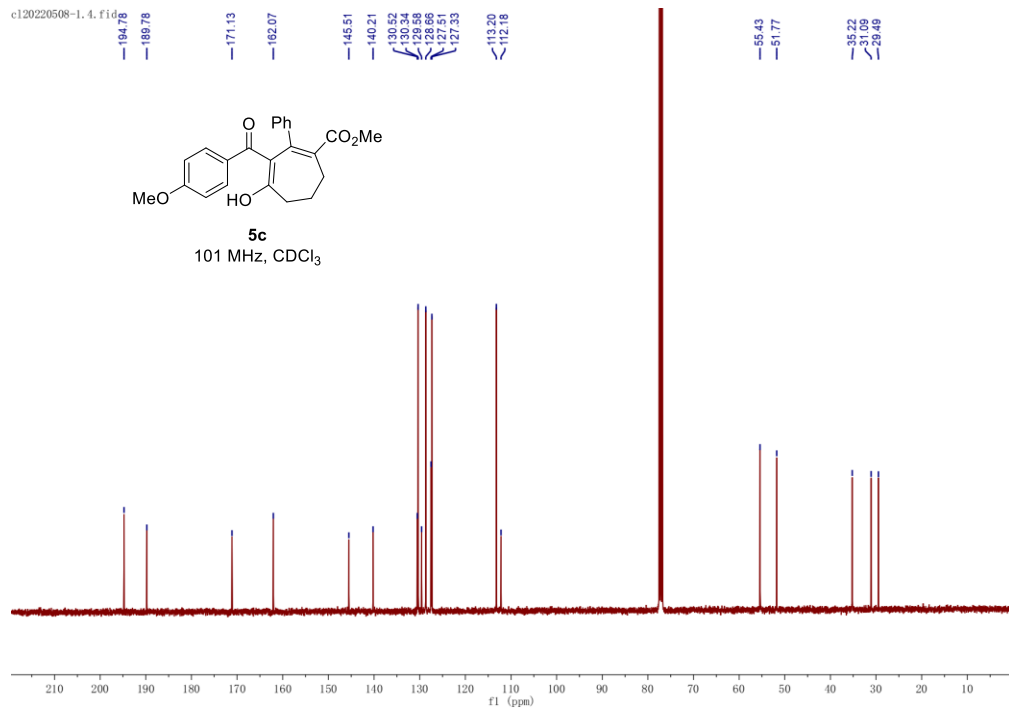

CL20220513-1  
single\_pulse

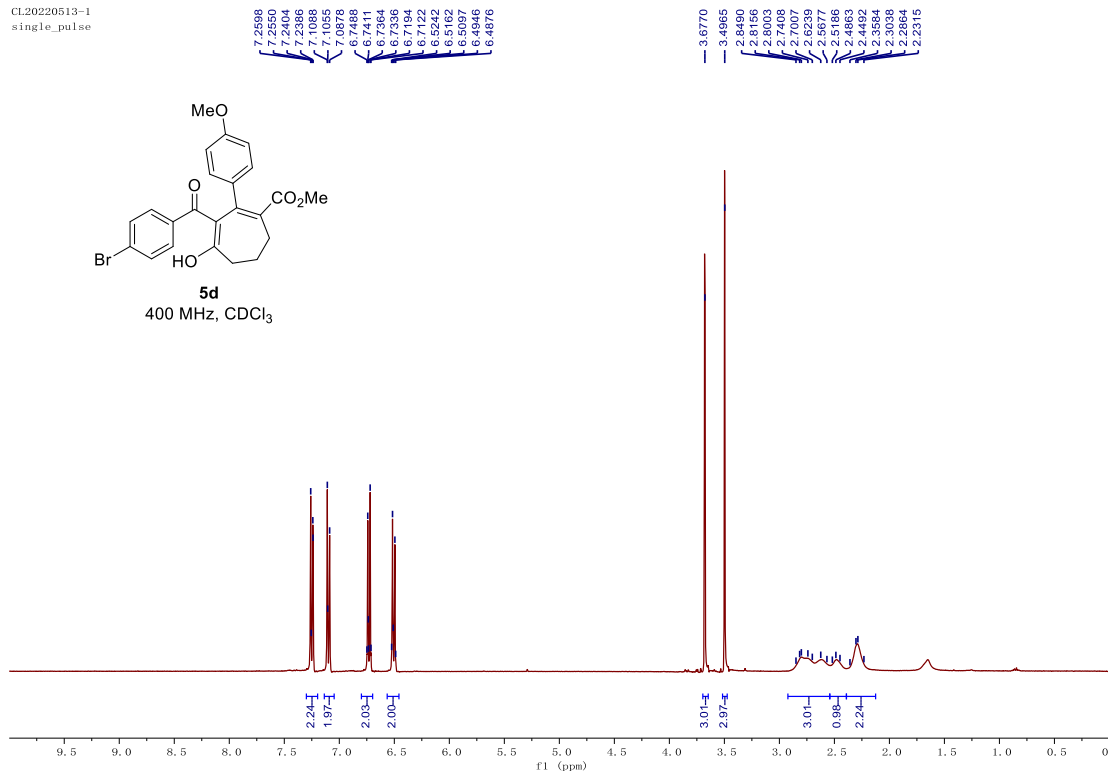

CL20220513-1  
single\_pulse decoupled

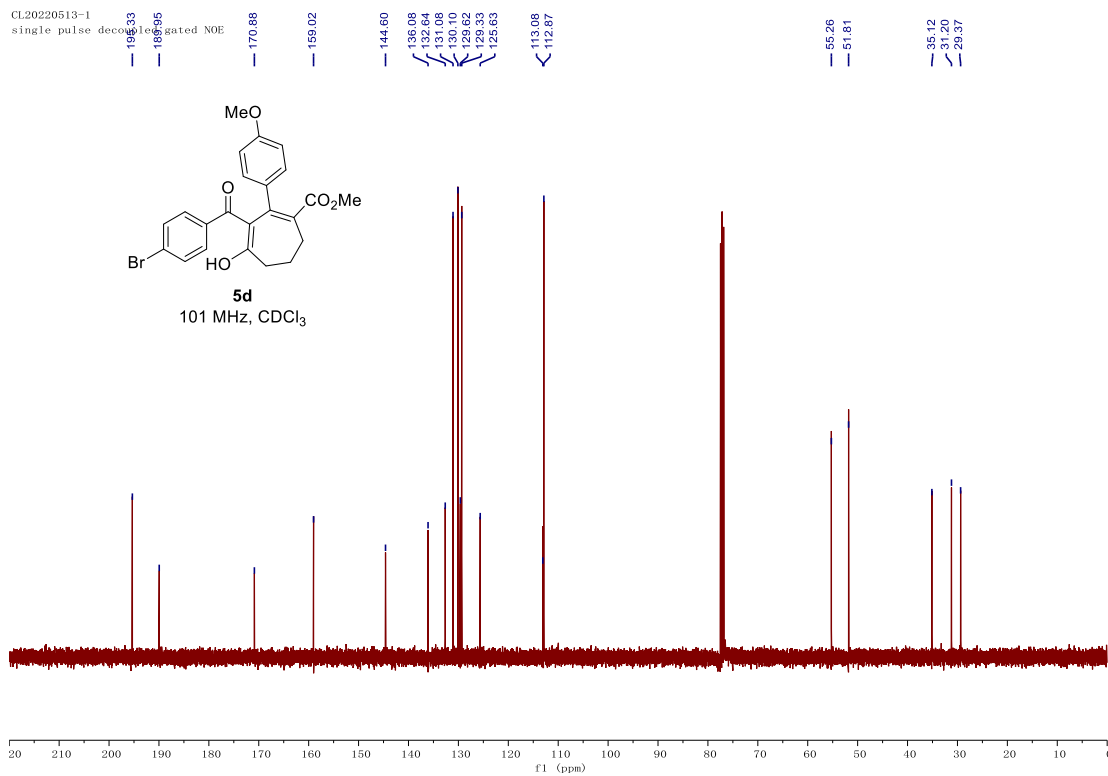



HLJ-220519-1-2

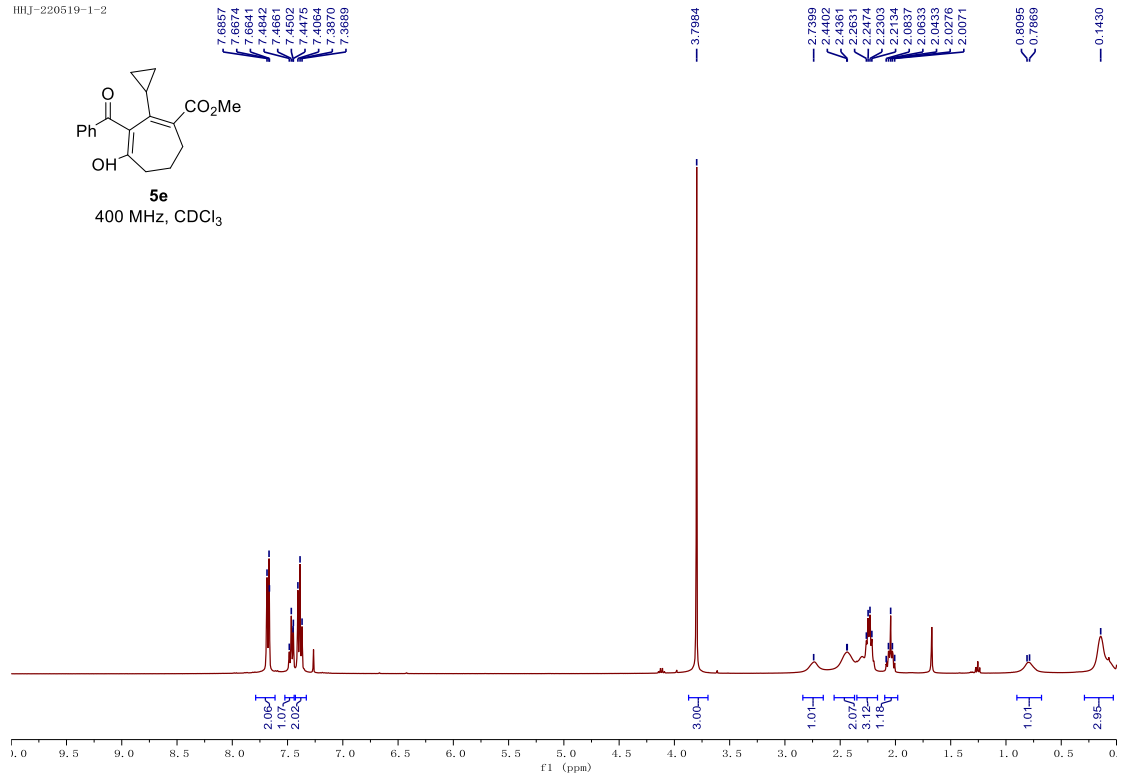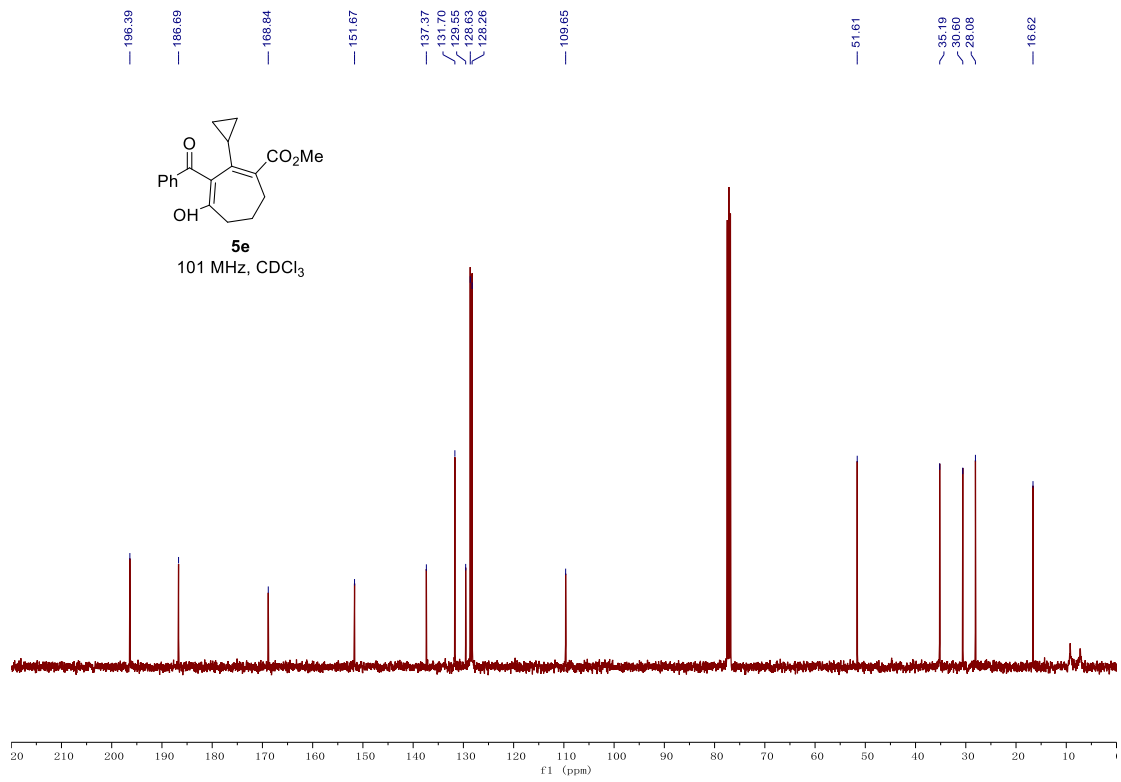

CL20220525-2. 1. f1.d

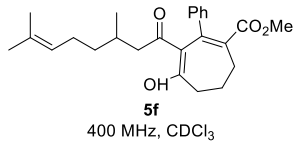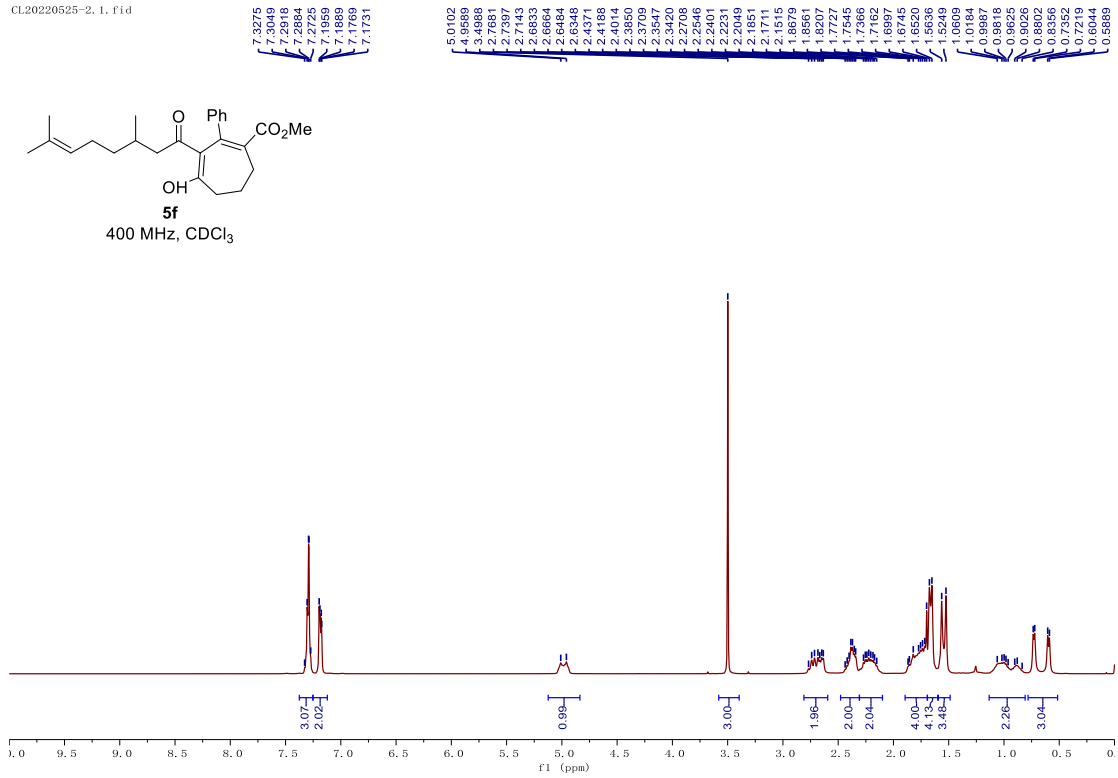

CL20220525-2

single pulse

gated NOE

136.46

132.26

132.00

131.98

171.05

170.99

143.15

143.00

140.70

131.96

131.91

131.59

131.49

128.43

128.25

124.37

124.33

113.35

113.08

51.77

44.68

37.00

36.75

35.09

34.94

30.98

30.32

30.06

29.06

25.76

25.27

19.57

19.11

17.72

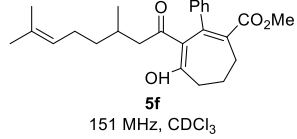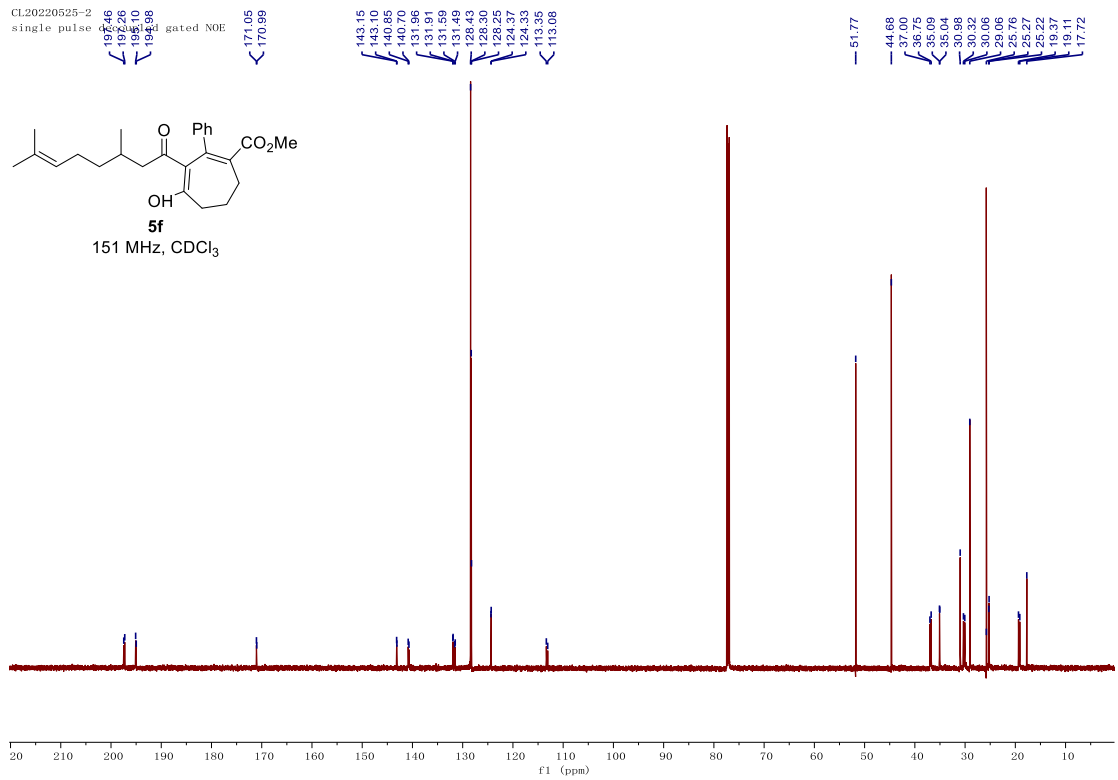

CL220607-1  
single\_pulse

7.2159  
7.2322  
7.2148  
7.2028  
7.0321  
7.0264  
7.0288  
7.0086

5.8795  
5.8670

4.6478  
4.5478

3.4794  
2.7886  
2.7474  
2.7076  
2.5291  
2.4905  
2.4470  
2.4246  
2.2315  
2.2061  
2.0286  
2.0097  
1.9885  
1.7898  
1.7409  
1.7159  
1.6039  
1.4474  
1.4118

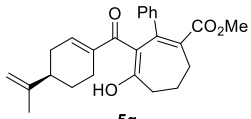

**5g**  
400 MHz, CDCl<sub>3</sub>

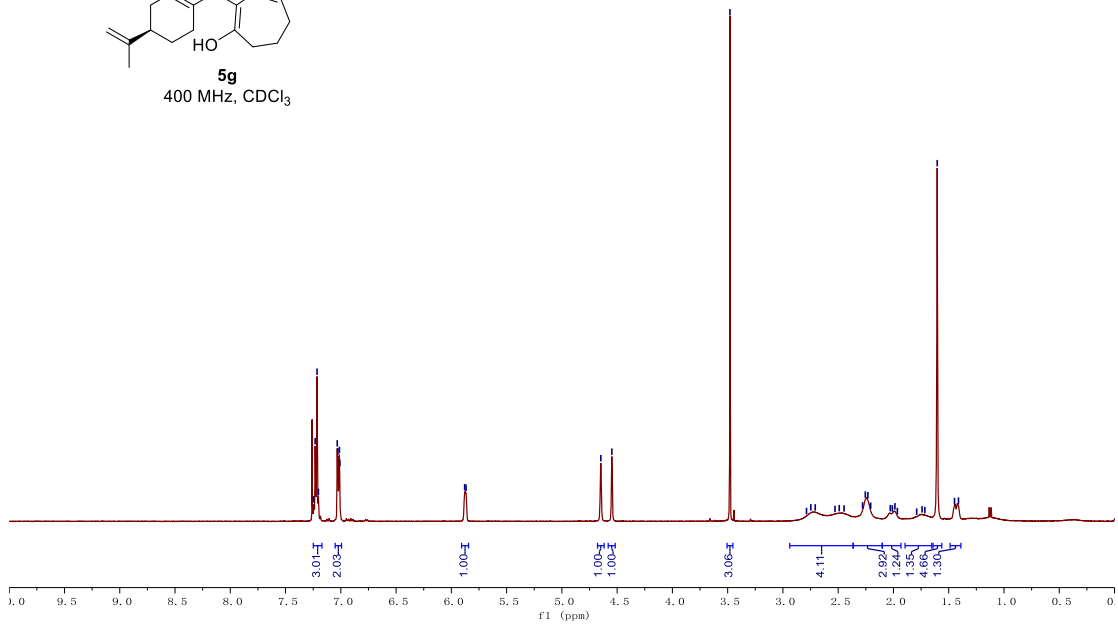

CL20220607-1  
single pulse decoupled gated NOE

163.83

171.16

149.17  
149.13  
145.95  
141.71  
135.20  
129.74  
128.70  
127.63

109.05

51.75

35.68  
31.13  
29.48

26.42

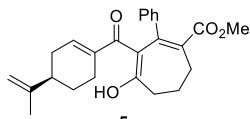

**5g**  
101 MHz, CDCl<sub>3</sub>

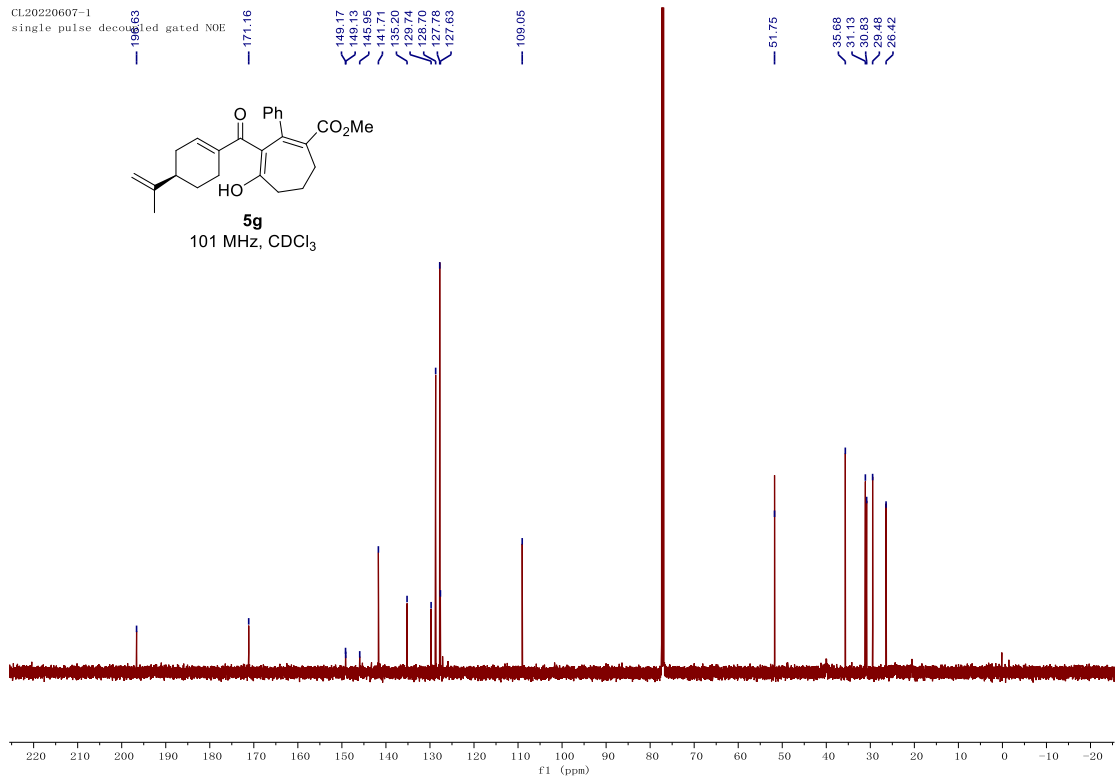

c120220507-1.1.fid

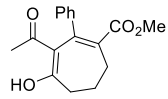

**5h**  
400 MHz, CDCl<sub>3</sub>

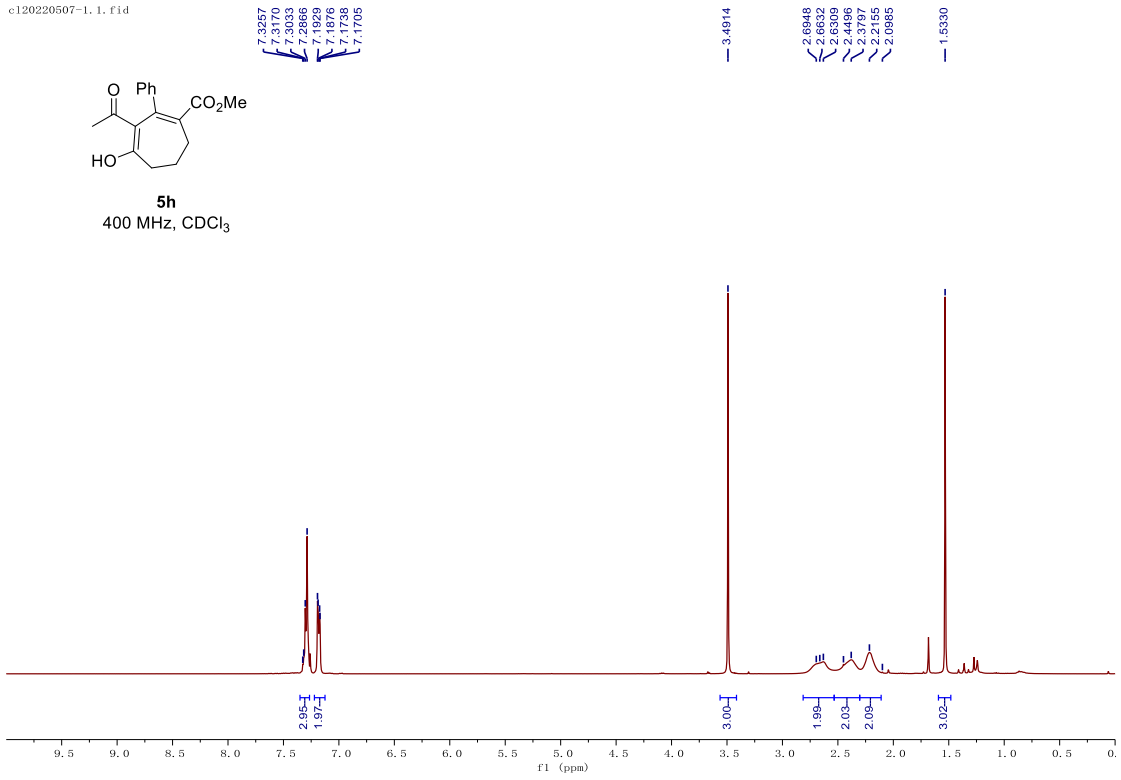

c120220507-1.2.fid

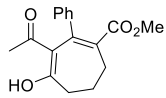

**5h**  
101 MHz, CDCl<sub>3</sub>

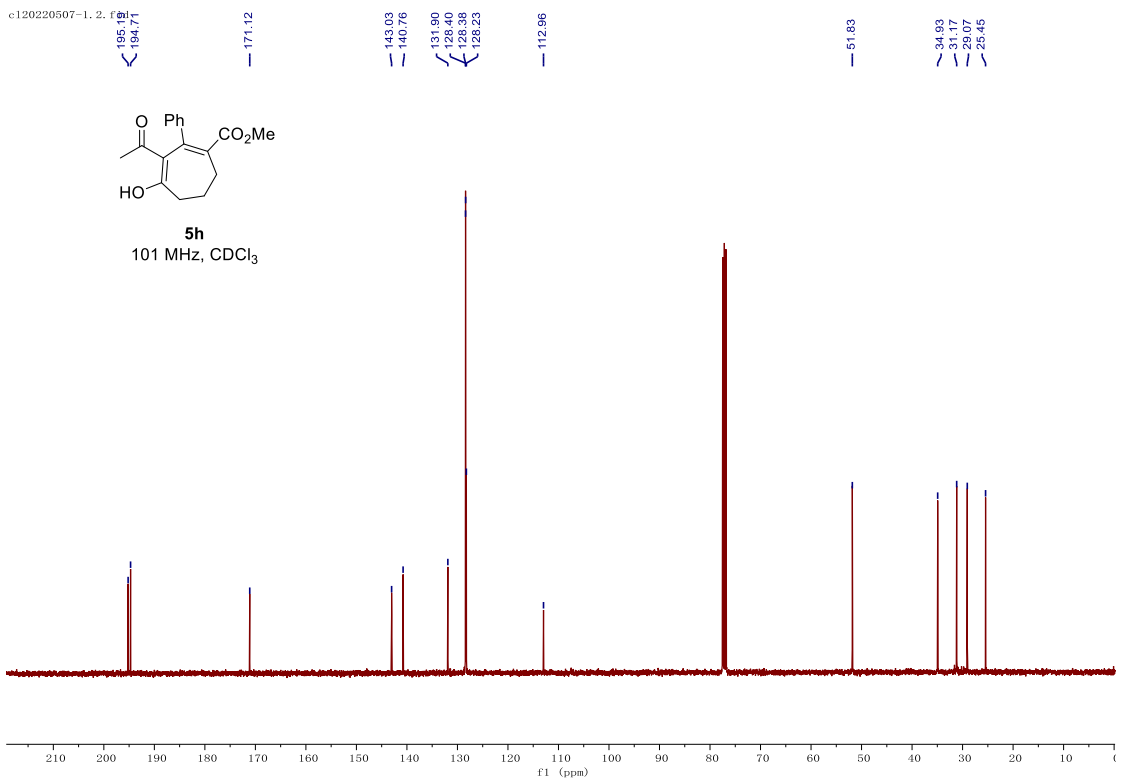

c120220513-2.1.fid

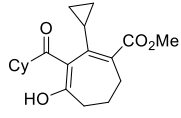

**5i**  
400 MHz, CDCl<sub>3</sub>

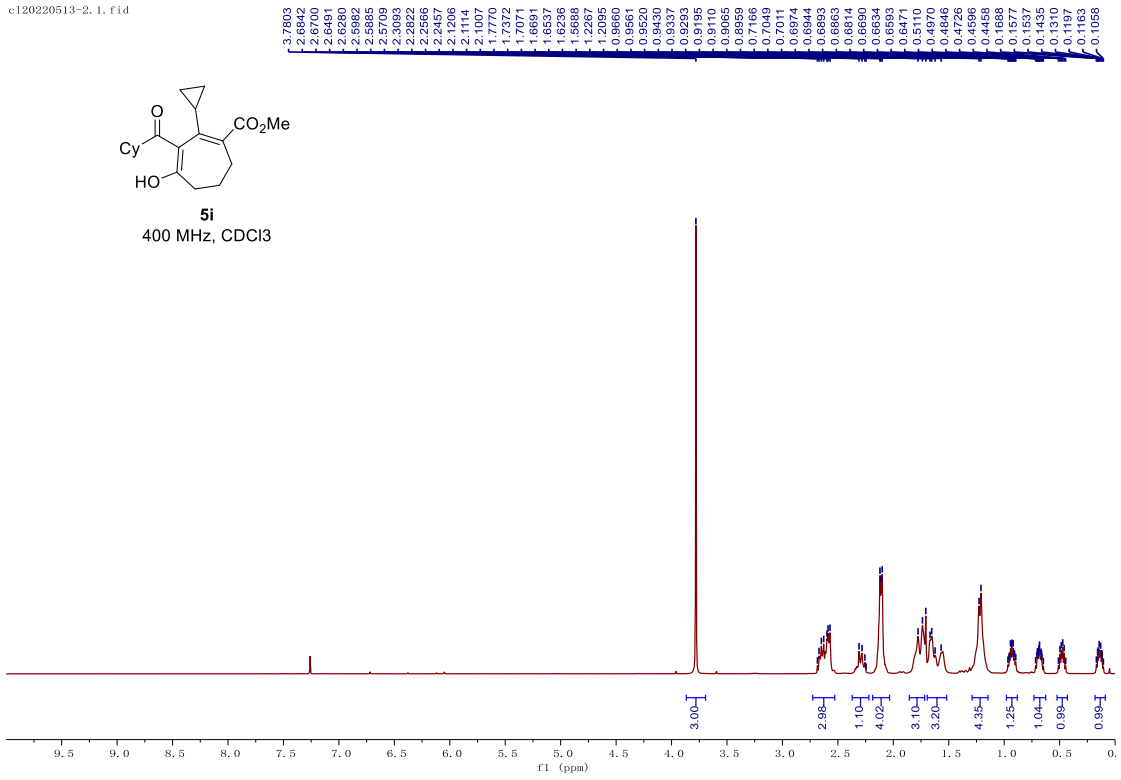

c120220513-2.2.fid

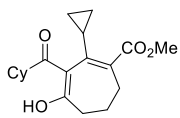

**5i**  
101 MHz, CDCl<sub>3</sub>

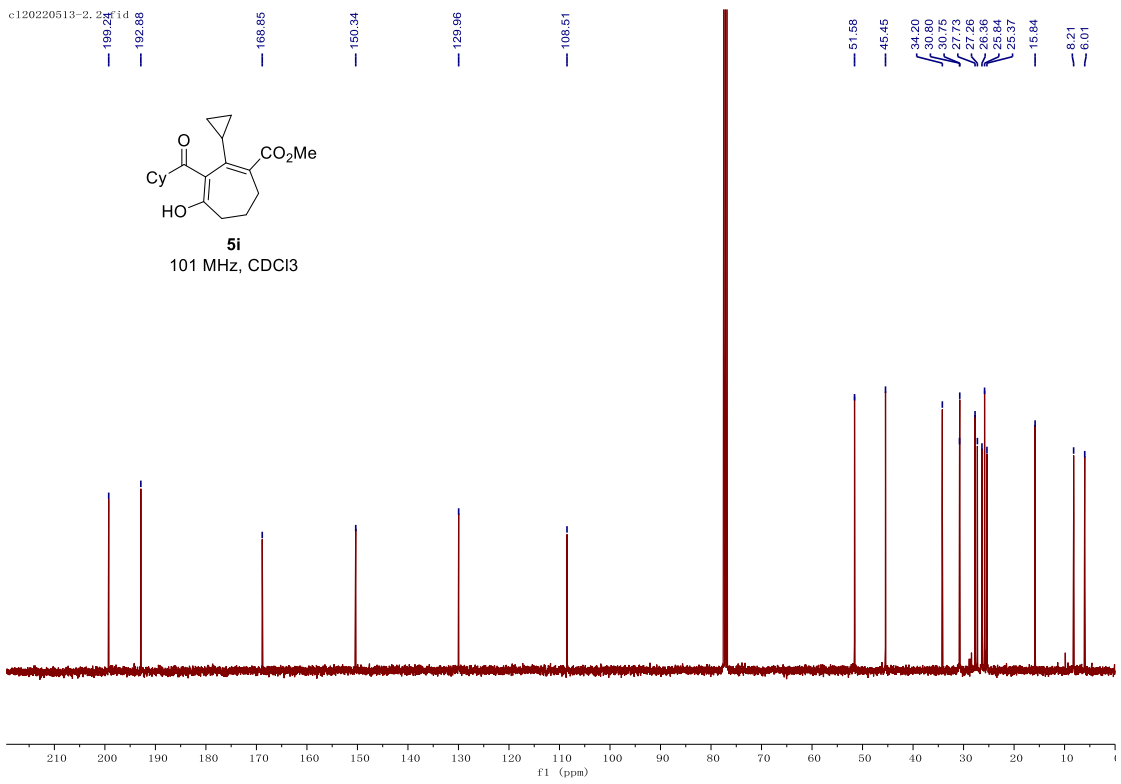

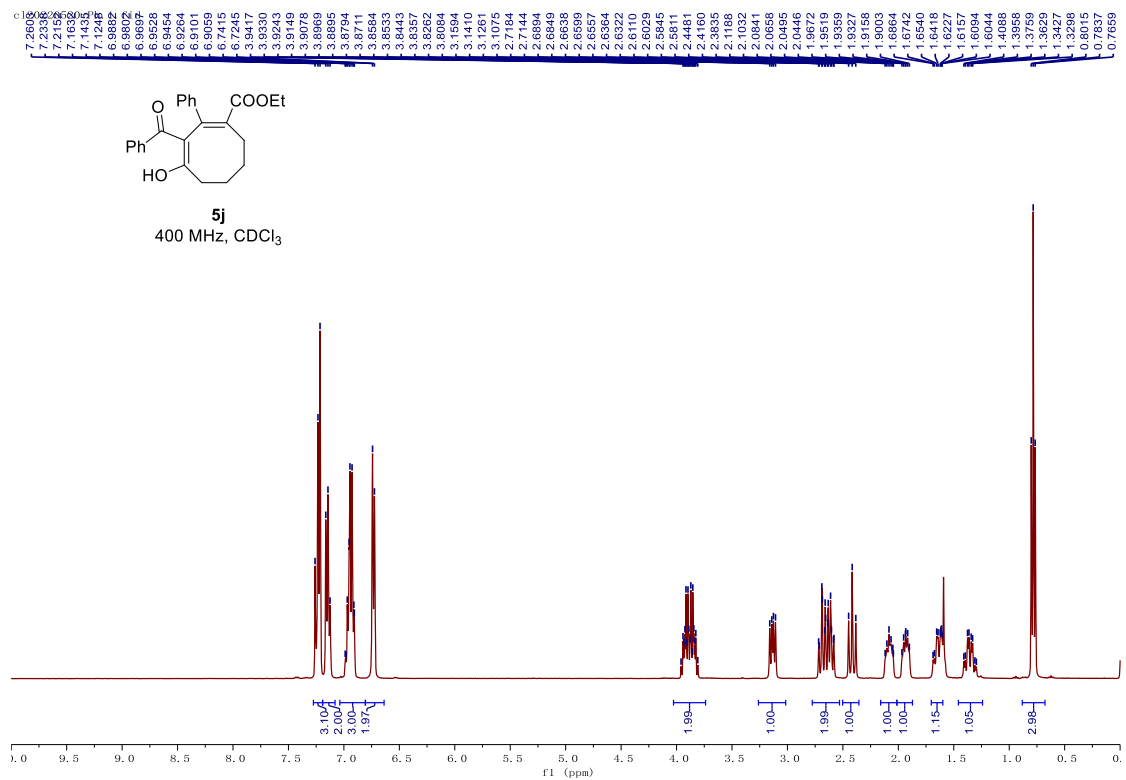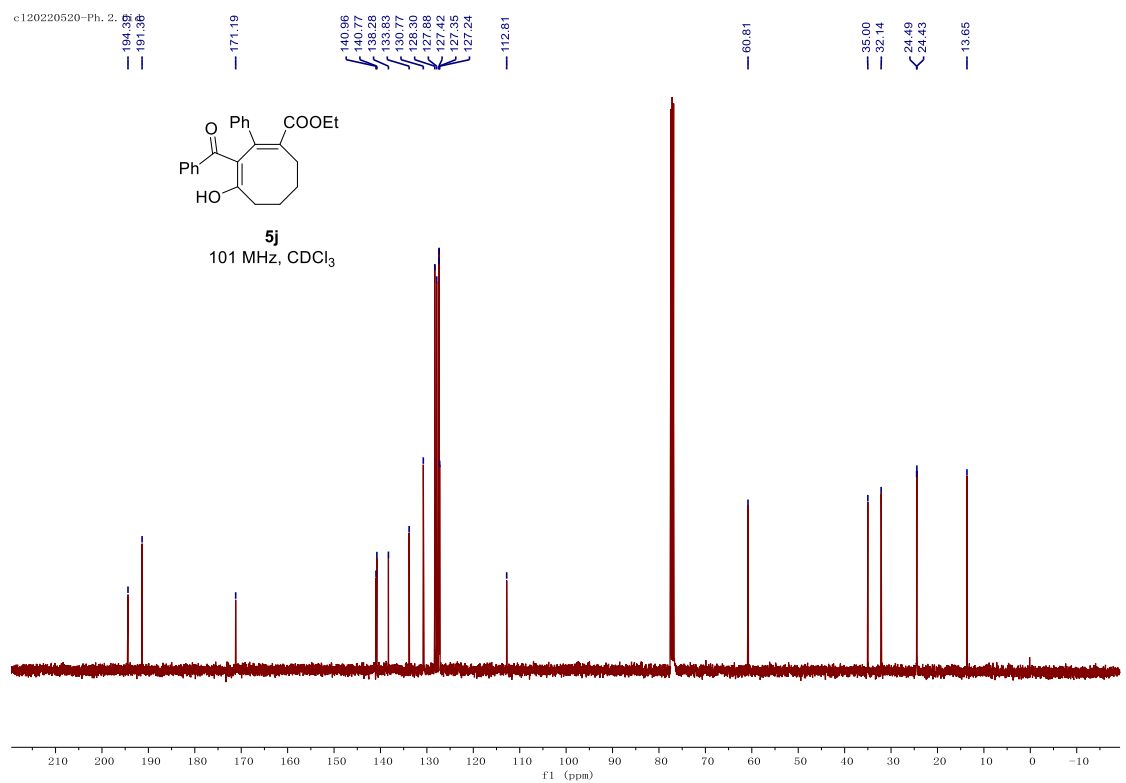

HHJ-220927-1-3H

7.2216  
7.2121  
7.2007  
7.1940  
7.1383  
7.1341  
7.1298  
7.1178  
7.1102  
7.1008  
7.0623  
7.0538  
7.0361

2.7083  
2.6928  
2.6840  
2.6102  
2.5281  
2.4555  
2.4380  
2.4272  
2.4022  
2.3842

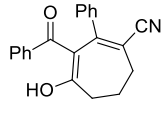

**5k**  
400 MHz, CDCl<sub>3</sub>

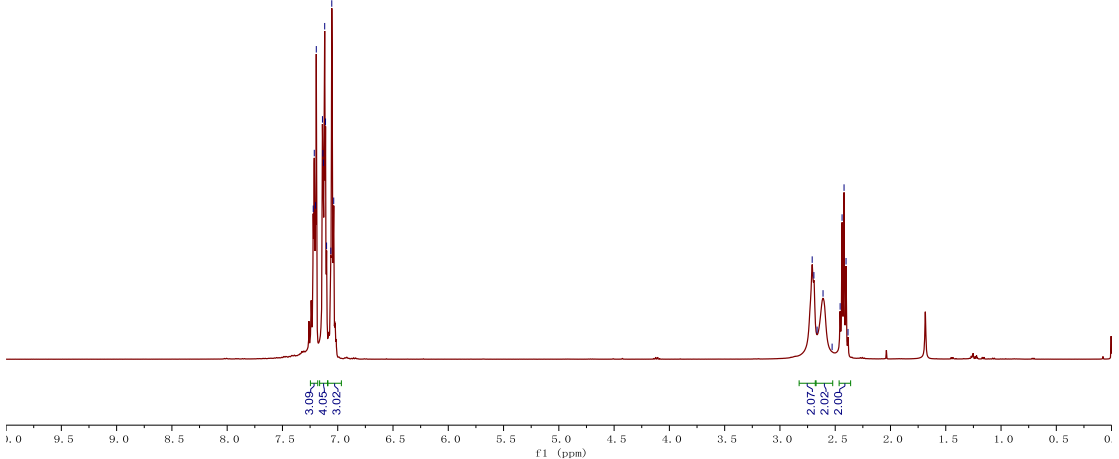

HHJ220927-1-3

195.36  
190.98

155.79

138.00  
136.49  
131.44  
128.87  
127.93  
127.89  
127.82  
120.29

111.34  
108.41

35.28  
30.95  
30.42

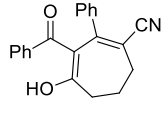

**5k**  
101 MHz, CDCl<sub>3</sub>

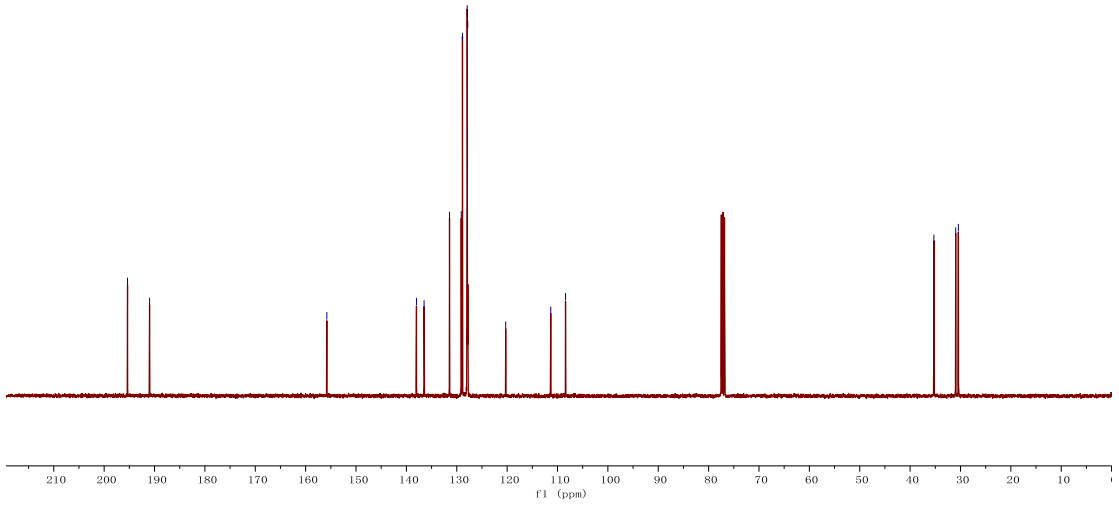

20220526-1.1.fid

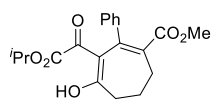

**7a**  
400 MHz, CDCl<sub>3</sub>

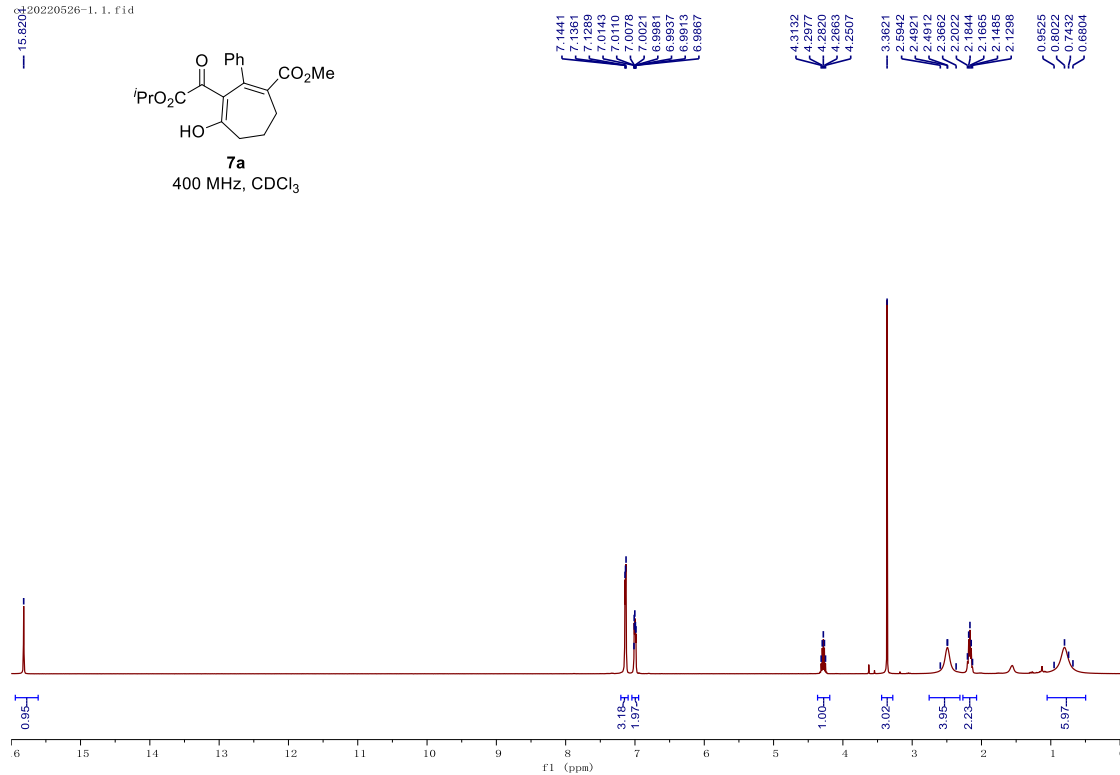

c120220526-1.2.fid

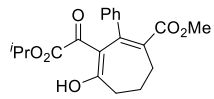

**7a**  
101 MHz, CDCl<sub>3</sub>

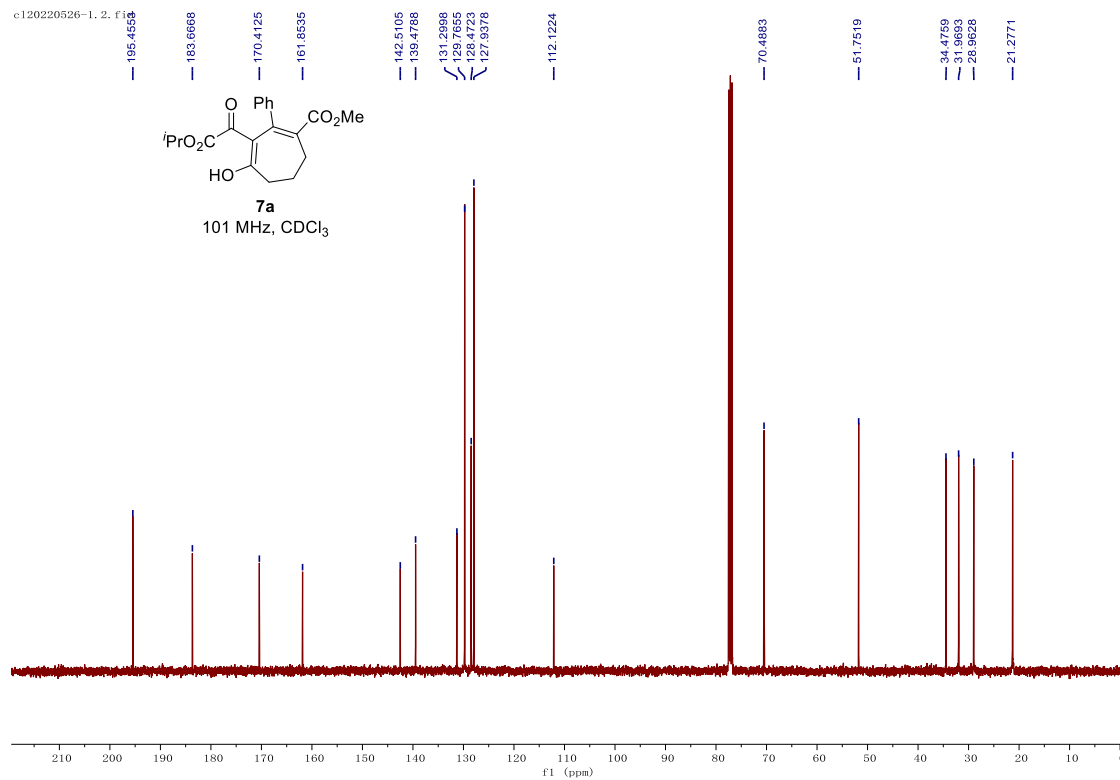



20220603-1. 1. f1.d

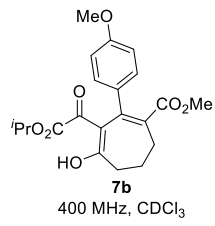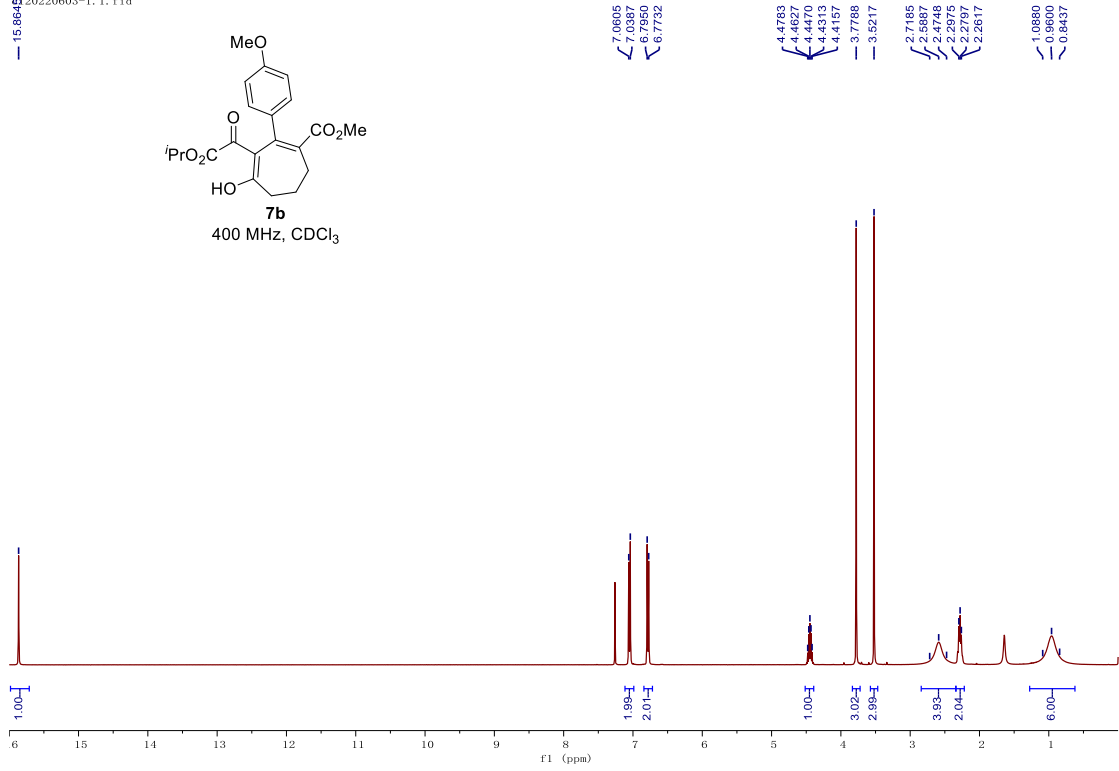

c120220603-1. 2. f1.d

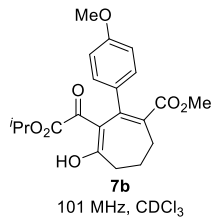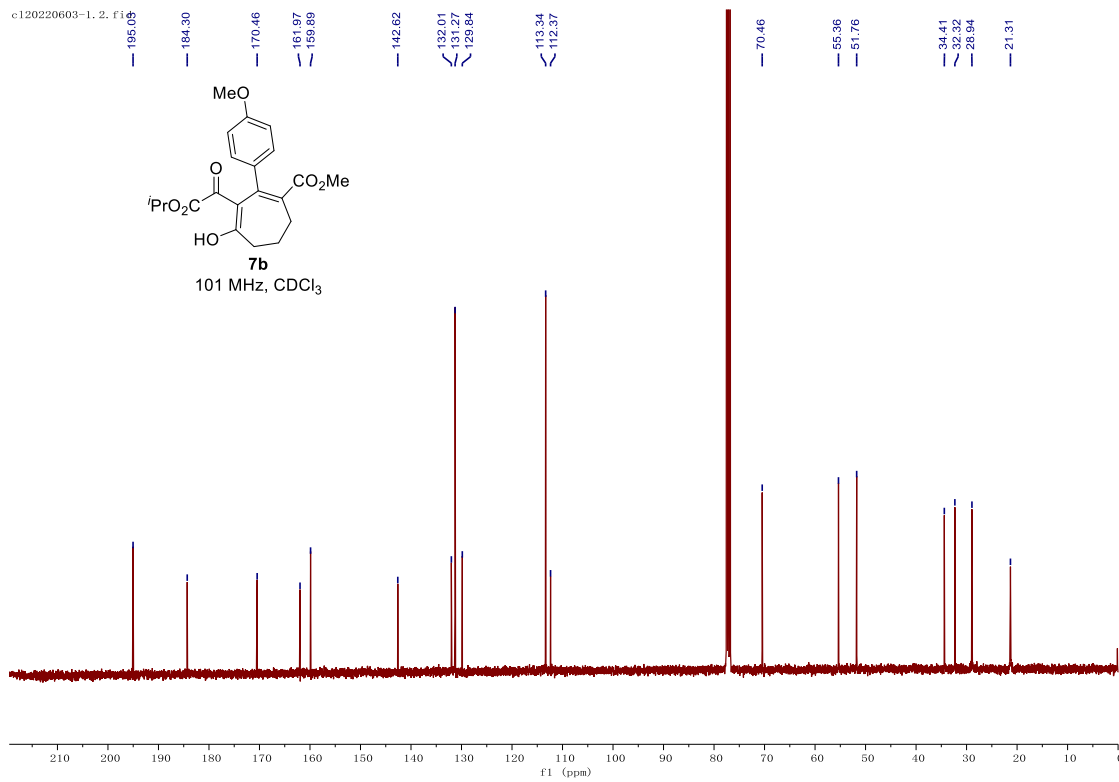

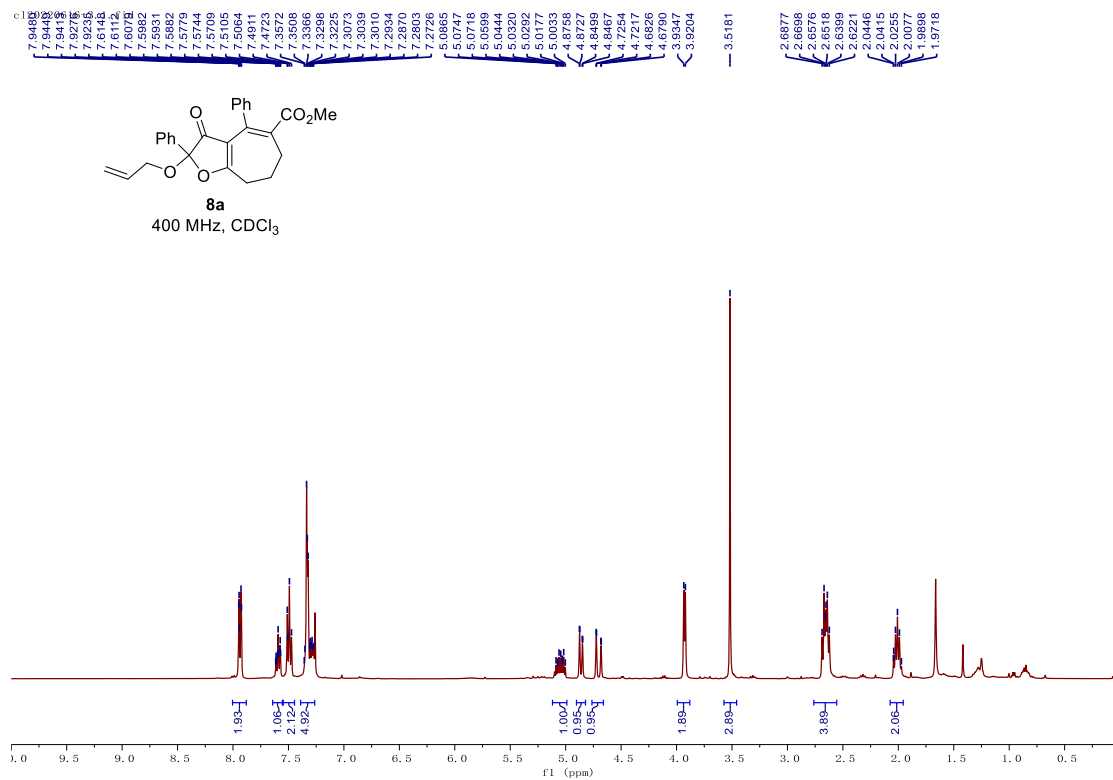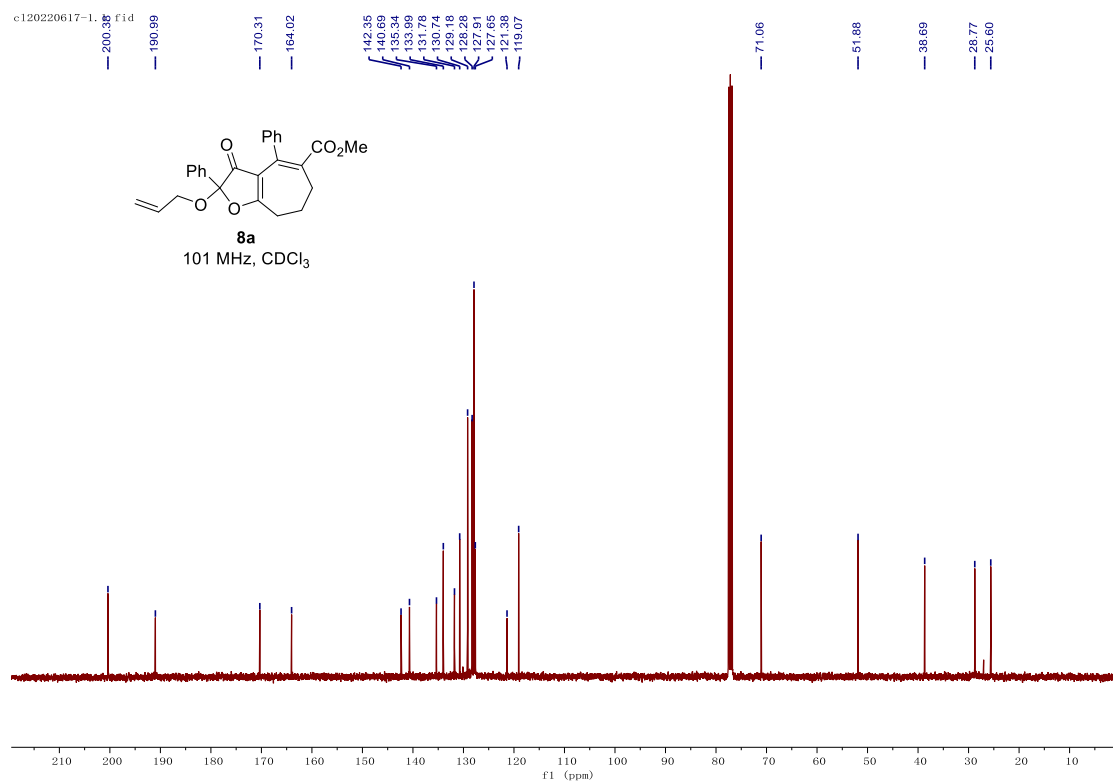

CL20220602-4  
single\_pulse

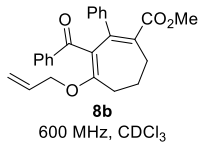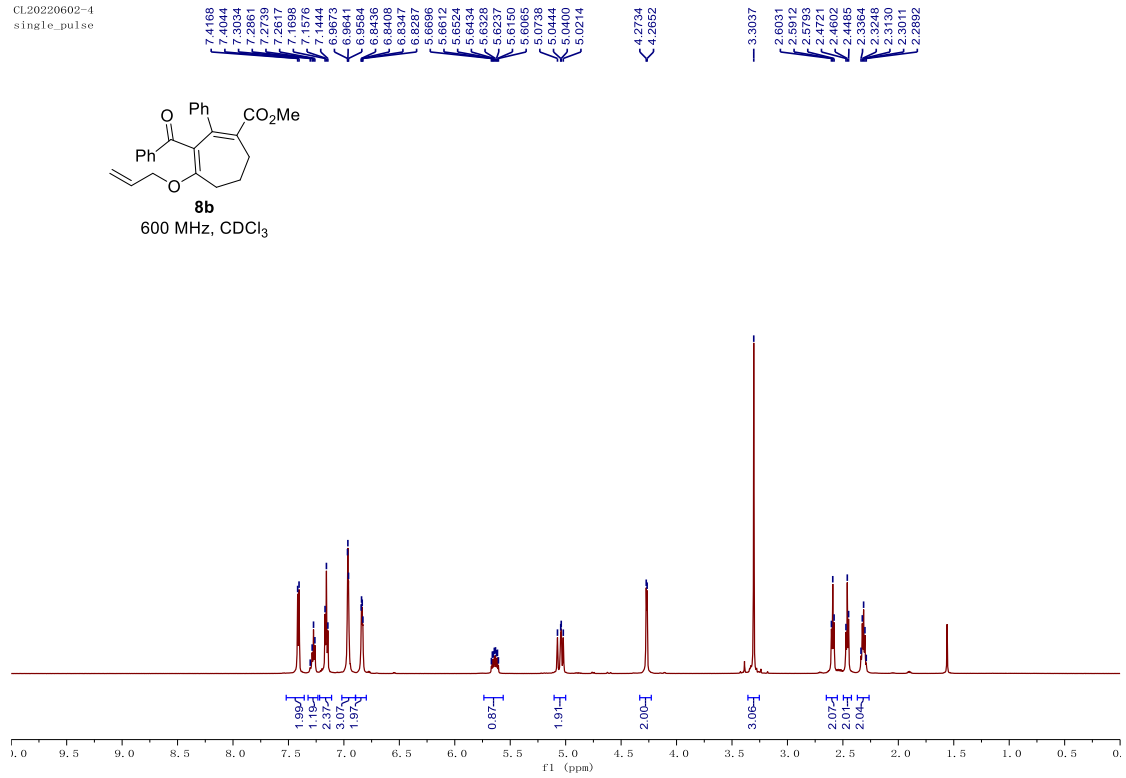

c120220602-4.2.f1

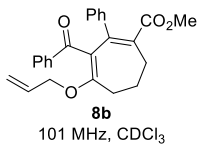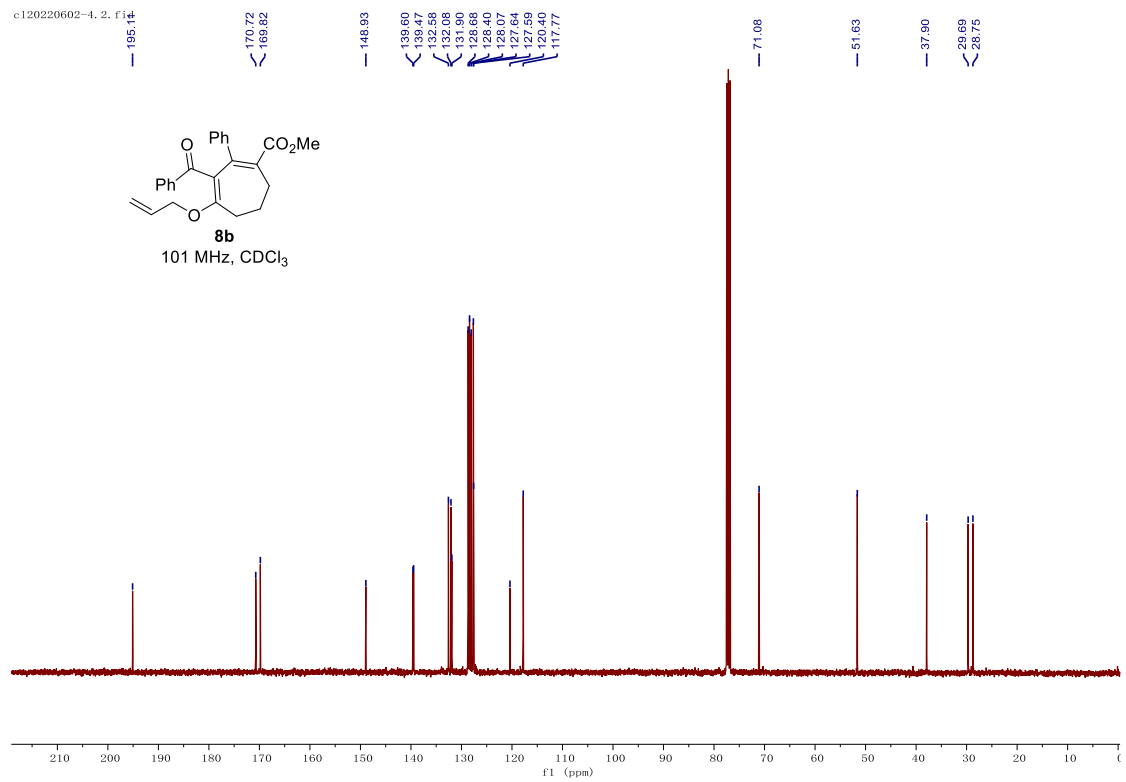

c120220414-1. 1. f1d

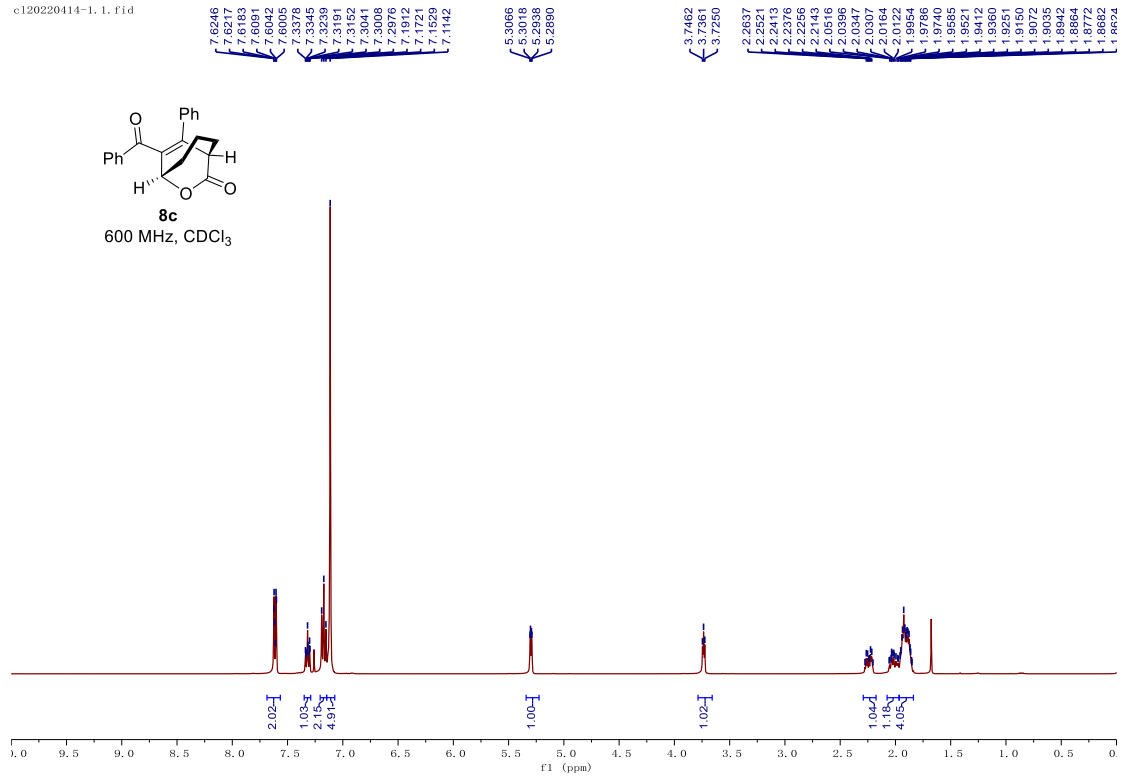

Cl20220415-1

single pulse decoupled gated NOE

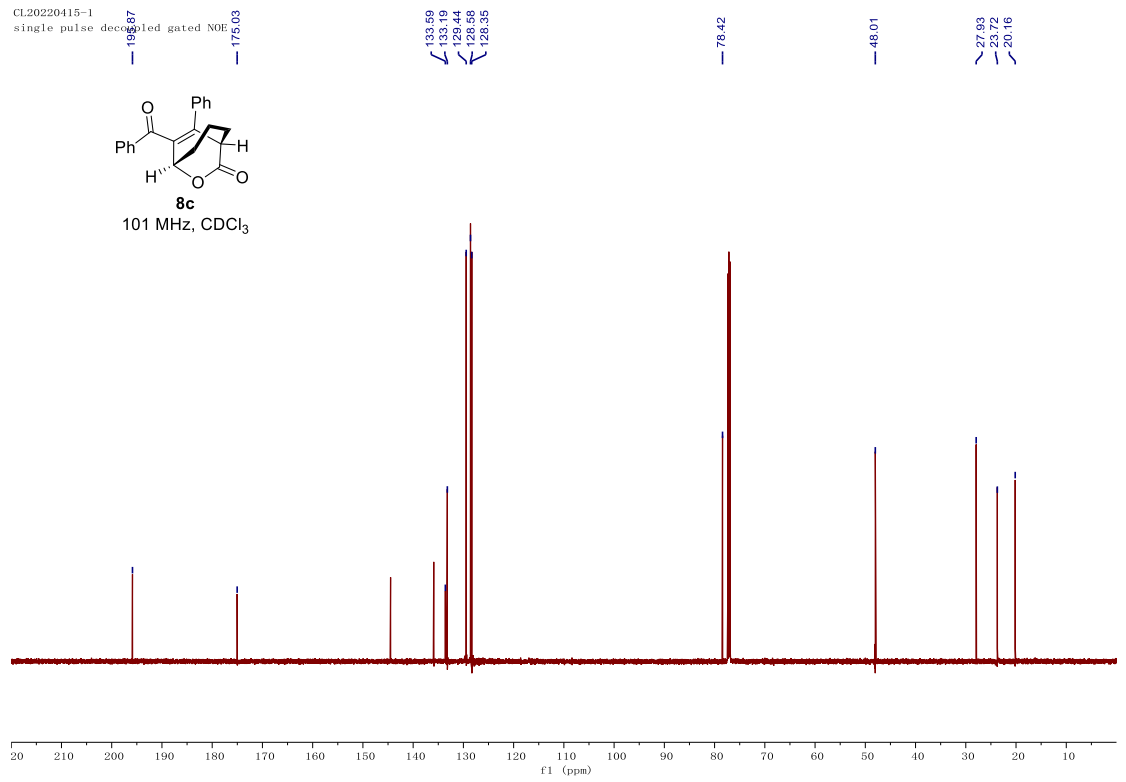

### VIII. HPLC spectra for *ee* determination

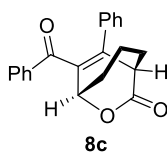

#### <Chromatogram>

mV

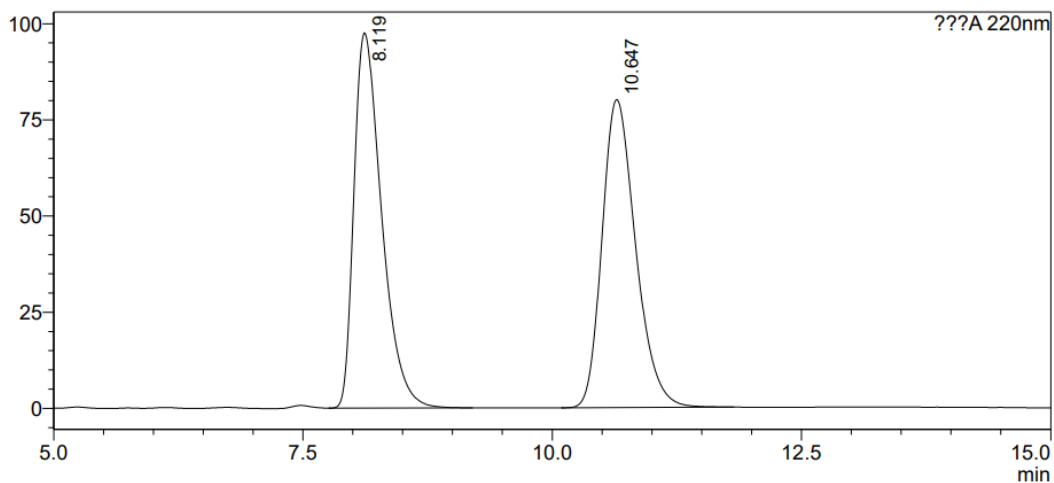

#### <Peak Table>

???A 220nm

| Peak# | Ret. Time | Area    | Height | Conc.  | Unit | Mark | Name |
|-------|-----------|---------|--------|--------|------|------|------|
| 1     | 8.119     | 1879900 | 97493  | 50.014 |      |      |      |
| 2     | 10.647    | 1878821 | 80081  | 49.986 |      |      |      |
| Total |           | 3758721 | 177573 |        |      |      |      |

#### <Chromatogram>

mV

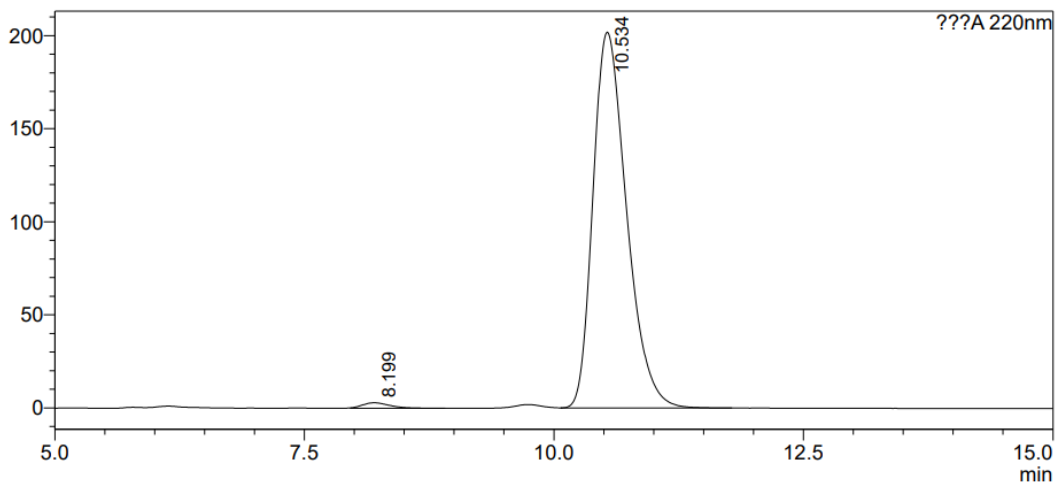

#### <Peak Table>

???A 220nm

| Peak# | Ret. Time | Area    | Height | Conc.  | Unit | Mark | Name |
|-------|-----------|---------|--------|--------|------|------|------|
| 1     | 8.199     | 54478   | 2911   | 1.140  |      | M    |      |
| 2     | 10.534    | 4725980 | 201840 | 98.860 |      |      |      |
| Total |           | 4780458 | 204751 |        |      |      |      |
